# Supplementary material for: Unbalanced emission reductions of different species and sectors in China during COVID-19 lockdown derived by multi-species surface observation assimilation
Source: Copernicus journal article supplement (doi:10.5194/acp-23-6217-2023), 2023-06-07
Supplement: Supplementary file 1 [file acp-23-6217-2023-supplement.pdf]

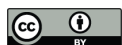

*Supplement of*

## **Unbalanced emission reductions of different species and sectors in China during COVID-19 lockdown derived by multi-species surface observation assimilation**

**Lei Kong et al.**

*Correspondence to:* Xiao Tang (tangxiao@mail.iap.ac.cn)

The copyright of individual parts of the supplement might differ from the article licence.

# Supplementary Material

## Text S1: Evaluation of meteorological simulation

Performance of meteorological simulation is important for the inversion estimation since the meteorological parameters determine the transport process from the sources to the observation and influence the estimation of flow-dependent background error covariance. The air temperature, relative humidity and precipitation also affect the atmospheric chemistry and the removal of air pollutants. The meteorology simulation was evaluated against the daily observations from China Meteorological Administration (CMA) with spatial distribution of meteorological observation sites shown in Fig. S25. Figure S26–31 present the comparisons of simulated and observed regional mean daily meteorological parameters (i.e., u-wind, v-wind, temperature, relative humidity and precipitation) over six regions of China from January to February 2020, with calculated evaluation statistics summarised in Table S4. In general, the simulation can well capture the main features of the observed meteorological conditions in all regions for our simulation period. All variables exhibited small RMSE values in all regions, that are around 1 m/s for wind speed, 1°C for T, 10% for RH and 0.08–2.38mm for precipitation. Therefore, the WRF can generally well reproduce the meteorological conditions for all regions of China, which is adequate for our inversion estimates.

## Text S2: Assessment of the influence of chemiluminescence monitor interference on the inversion of NO<sub>x</sub> emission

The NO<sub>2</sub> measurement from CNEMC is made by the chemiluminescent analyser with a molybdenum converter, which is subject to the positive bias induced by the interference of HNO<sub>3</sub>, PAN and alkyl nitrates (AN) (Dunlea et al., 2007; Lamsal et al., 2008). To investigate the influence of the chemiluminescence monitor interference on the NO<sub>2</sub> measurement and its impact on the inversion of NO<sub>x</sub> emissions, a sensitivity inversion run was conducted based on the corrected NO<sub>2</sub> measurement using the corrected factors (Eq. (1)) proposed by Lamsal et al. (2008). In order to alleviate the effects of emission uncertainty on the CF calculations, the CF values were calculated based on the simulated NO<sub>2</sub>, HNO<sub>3</sub>, PAN and AN using the inversed emission inventory. Figure S16 shows the calculated CFs for NO<sub>2</sub> measurements over different regions of China during COVID-19 pandemic, which ranged from 0.75 to 0.99. The CF values over NCP, NE, NW and Central were stable throughout the COVID-19 pandemic, all larger than 0.9, suggesting that chemiluminescence monitor interference only has slight effects on the NO<sub>2</sub> measurement there. Over the SE and SW regions, there was a drop of CF values during the lockdown period, followed by an increase after the lockdown, suggesting that the decline of NO<sub>2</sub> concentrations during lockdown period may be larger.

As shown in Figure S17, the overestimations were lower than 3 µg/m<sup>3</sup> over different regions of China throughout the COVID-19 pandemic, which is smaller than the observation errors (~10 µg/m<sup>3</sup>) we used in the assimilation, suggesting that the observation error caused by the chemiluminescence monitor interference were well considered in our assimilation. To better quantify the influences of chemiluminescence monitor interference on the inversed NO<sub>x</sub> emission, an additional inversion experiment was conducted based on the corrected NO<sub>2</sub> measurement using the calculated CFs. The results suggest the chemiluminescence monitor interference in the NO<sub>2</sub> observations had weak impacts on the inversed NO<sub>x</sub> emissions as seen in Fig. S18 and Fig. S19, which display the comparisons of the inversed NO<sub>x</sub> emission with and without correction in respect of the magnitude and change ratio during different stage of COVID-19 pandemic. The differences in the magnitude of inversed NO<sub>x</sub> emissions caused by correction were about 2–7% over the NCP, NE, NW and Central, and were about 10–13% over the SE and SW. The differences in the emission reductions of NO<sub>x</sub> were also small, which

36 was about 0.3 to 4.1 percentage points. These results indicate that due to the considerations of observation error in the EnKF, the  
 37 chemiluminescence monitor interference to the NO<sub>2</sub> measurement might not significantly influence our inversion results in this  
 38 application. However, the NO<sub>x</sub> emissions could be slightly overestimated due to the positive biases in the NO<sub>2</sub> measurement, and the  
 39 inversed NO<sub>x</sub> emissions may drop faster if the NO<sub>2</sub> measurement was corrected.

40 **Figures**

41

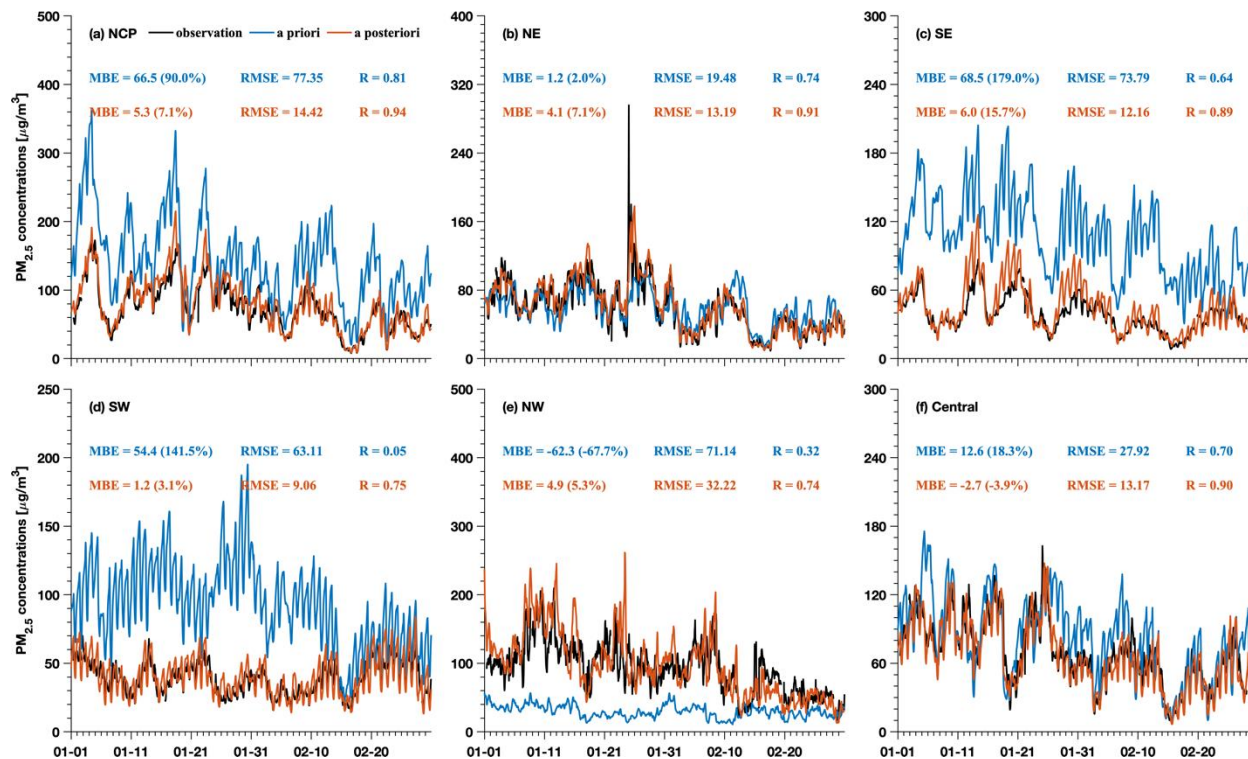

42

43 **Figure S1: Time series of PM<sub>2.5</sub> concentrations over (a) NCP, (b) NE, (c) SE, (d) SW, (e) NW and (f) Central regions from 1st Jan to 29th Feb**  
 44 **2020 obtained from observation (black line) and simulation using a priori (blue line) and a posteriori (orange line) emissions.**

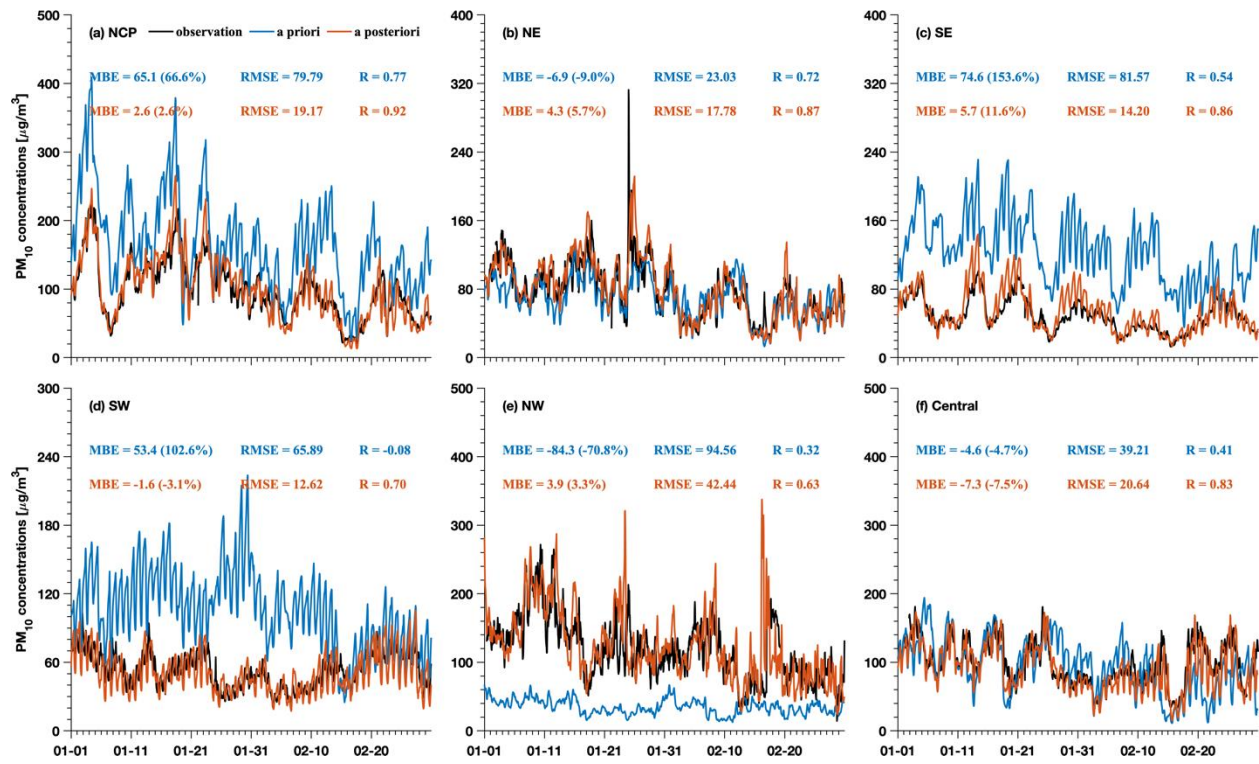

Figure S2: Same as in Fig. S1 but for PM<sub>10</sub> concentrations.

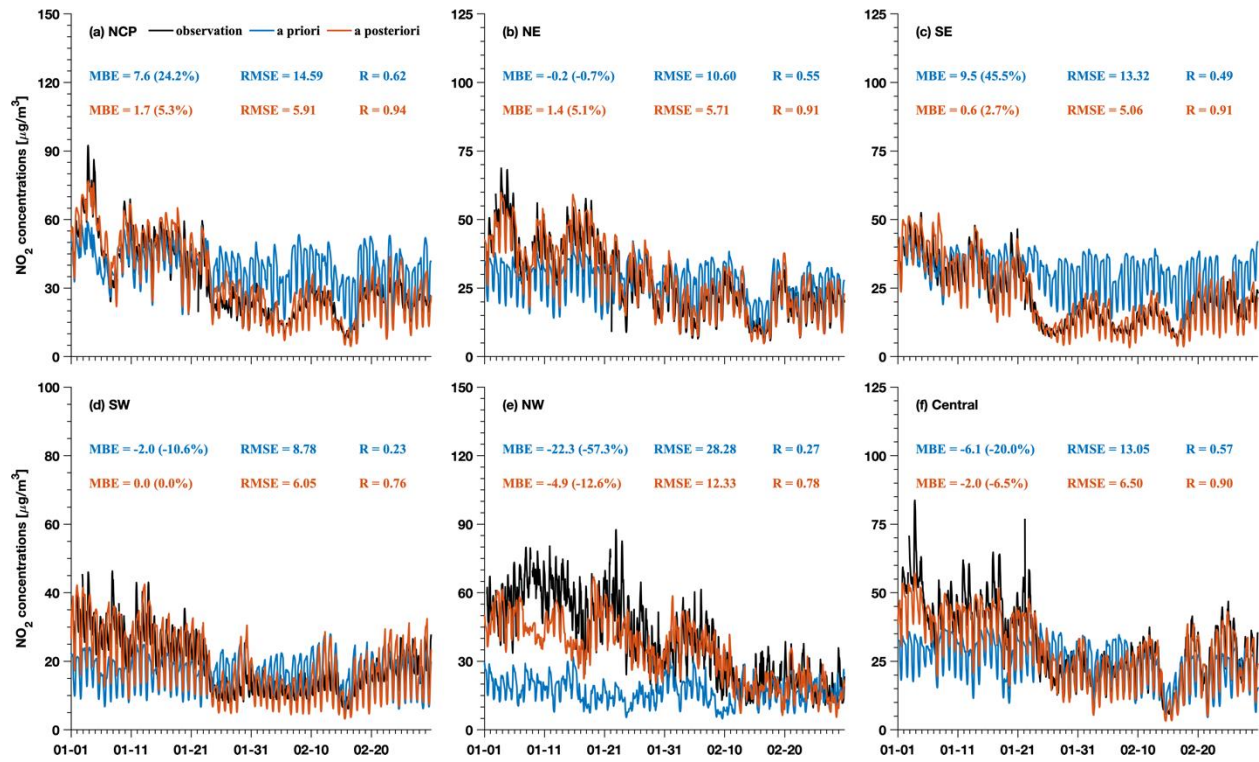

Figure S3: Same as in Fig. S1 but for NO<sub>2</sub> concentrations.

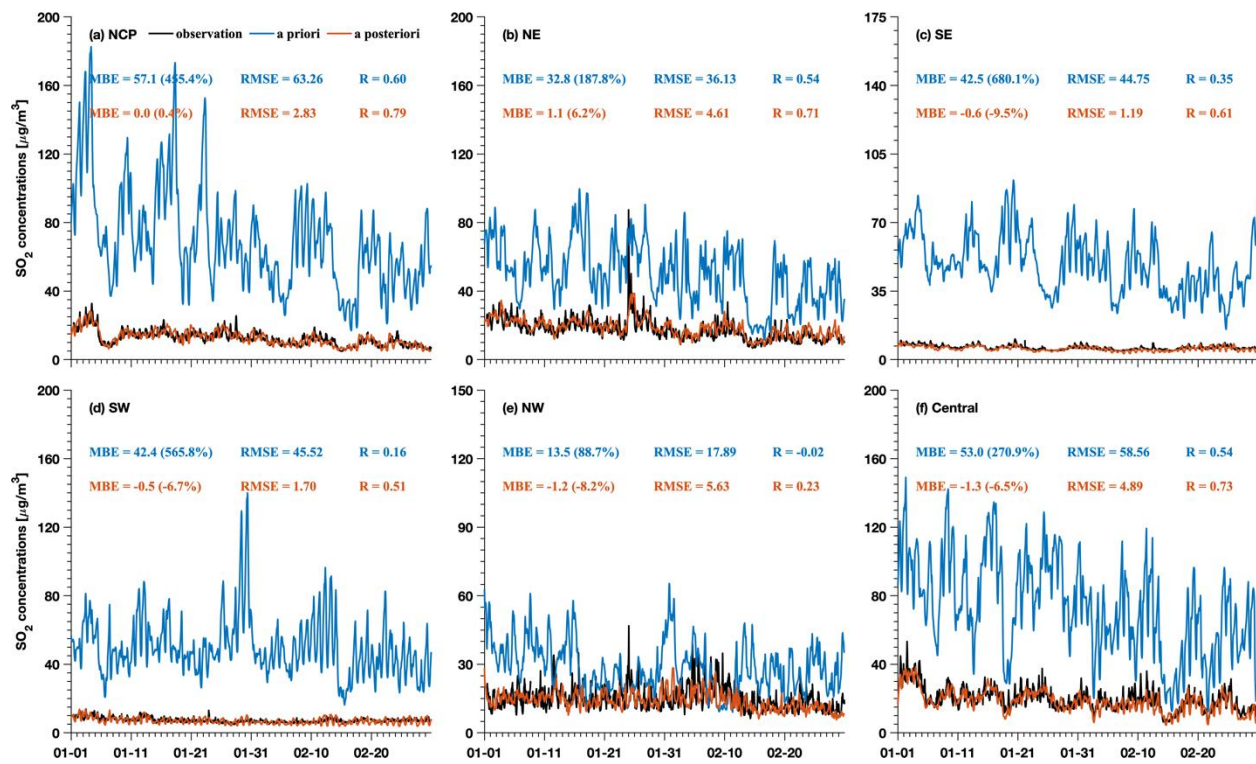

49

50

Figure S4: Same as in Fig. S1 but for SO<sub>2</sub> concentrations.

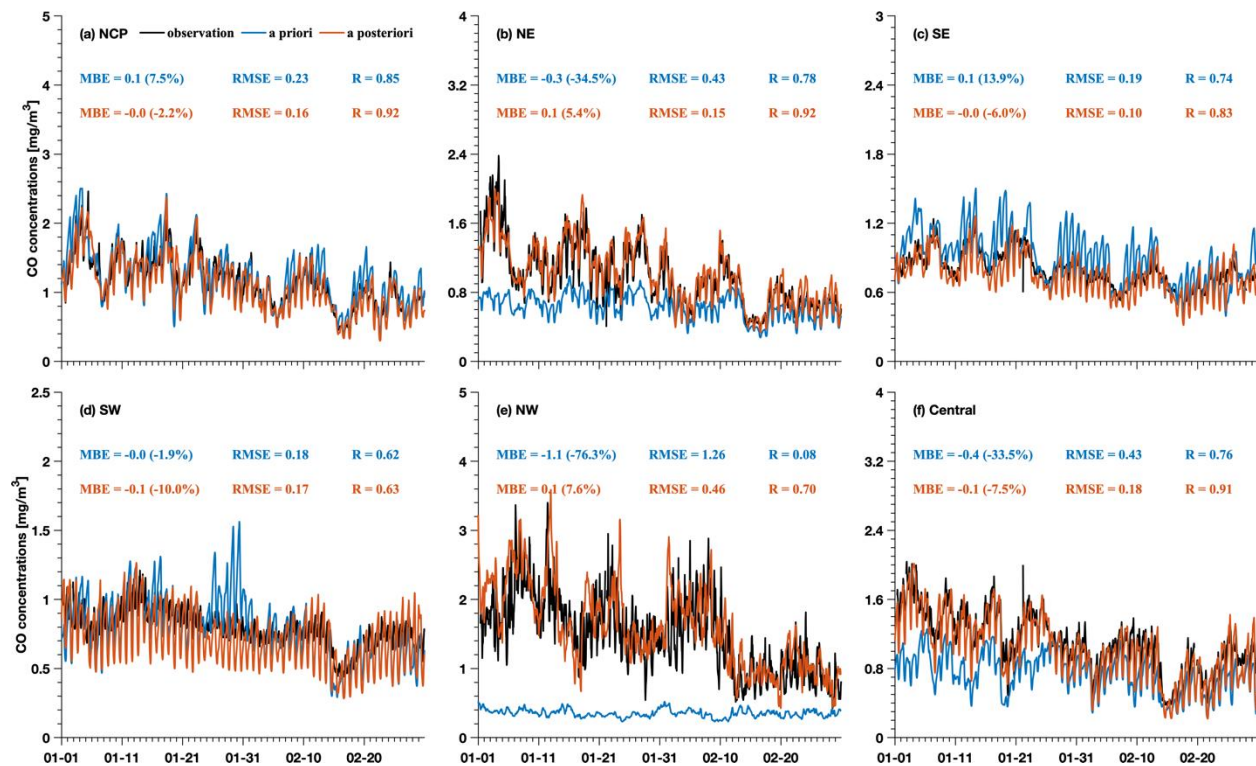

51

52

Figure S5: Same as in Fig. S1 but for CO concentrations.

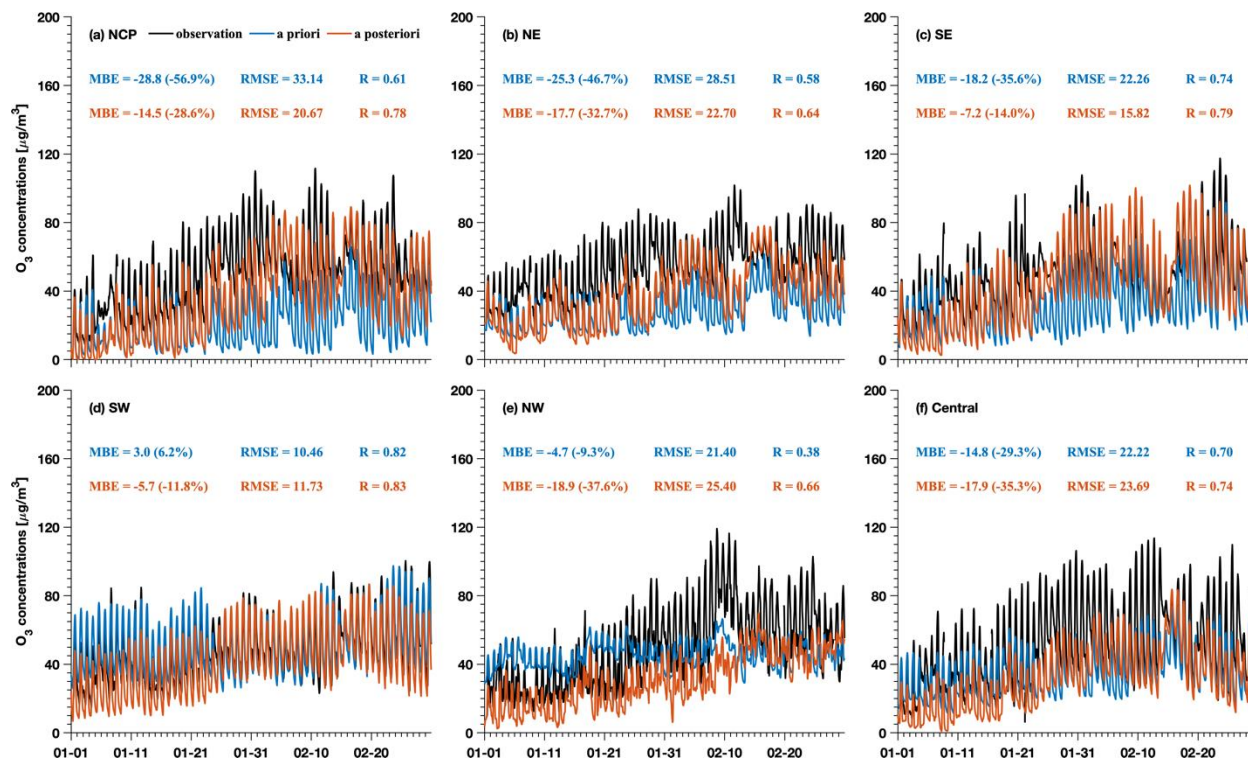

Figure S6: Same as in Fig. S1 but for O<sub>3</sub> concentrations.

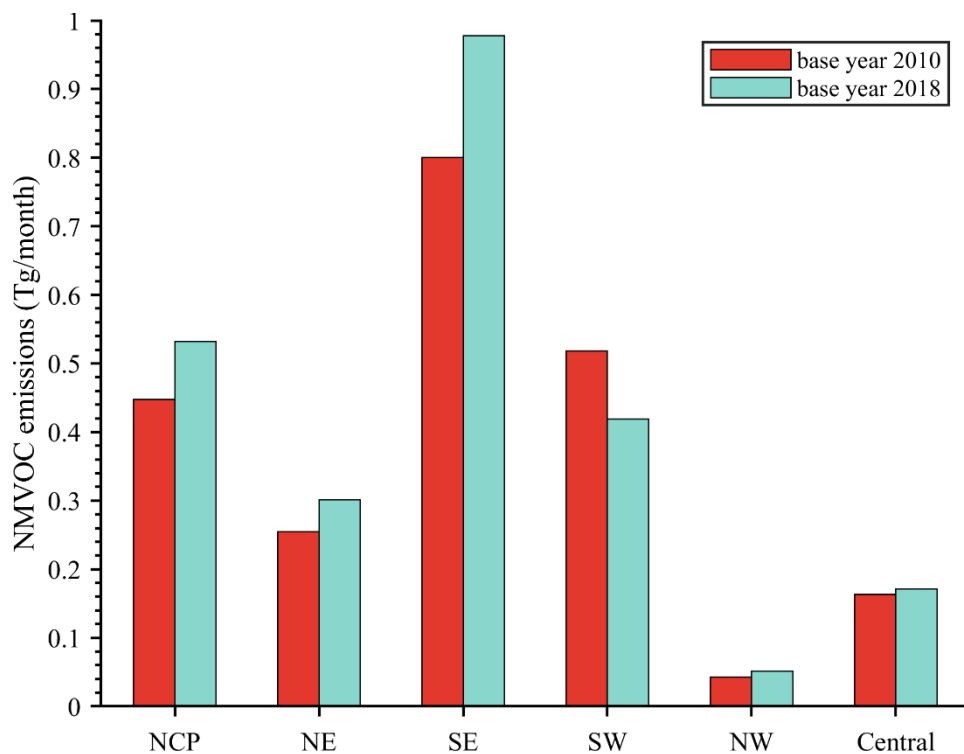

Figure S7: comparisons of the NMVOC emissions for base year 2010 with those for 2018 over different regions of China.

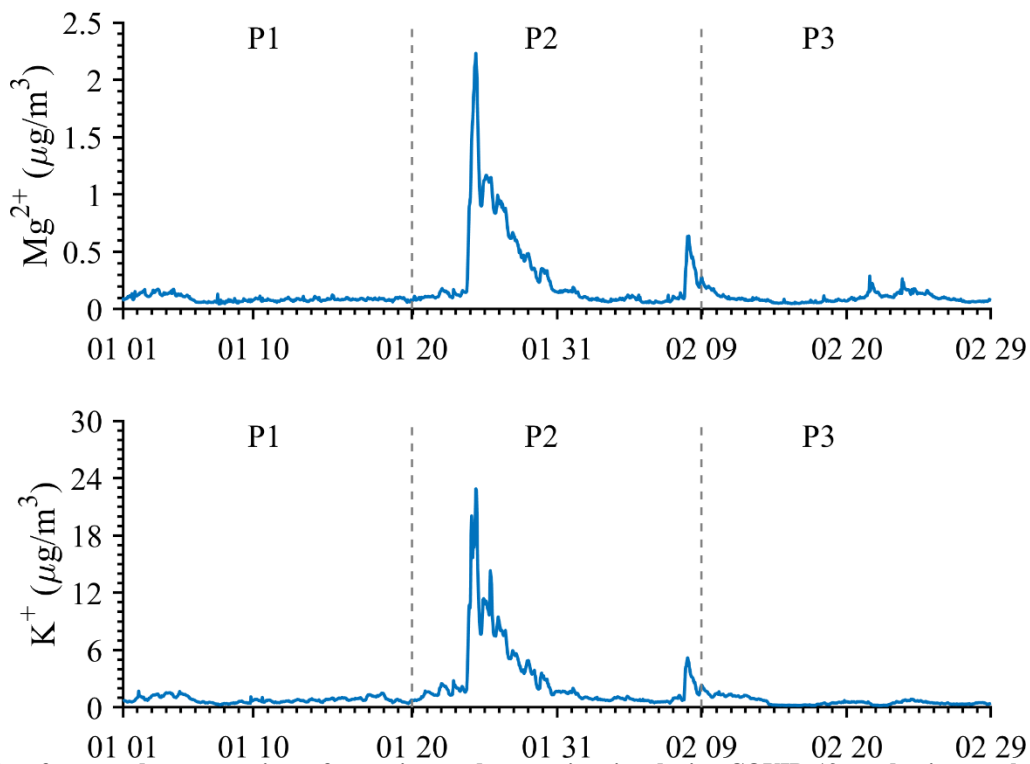

60  
61  
62  
63  
Figure S8: Timeseries of averaged concentrations of potassium and magnesium ion during COVID-19 pandemic over the NCP region. Measurements of potassium and magnesium ion were obtained from the CNEMC.

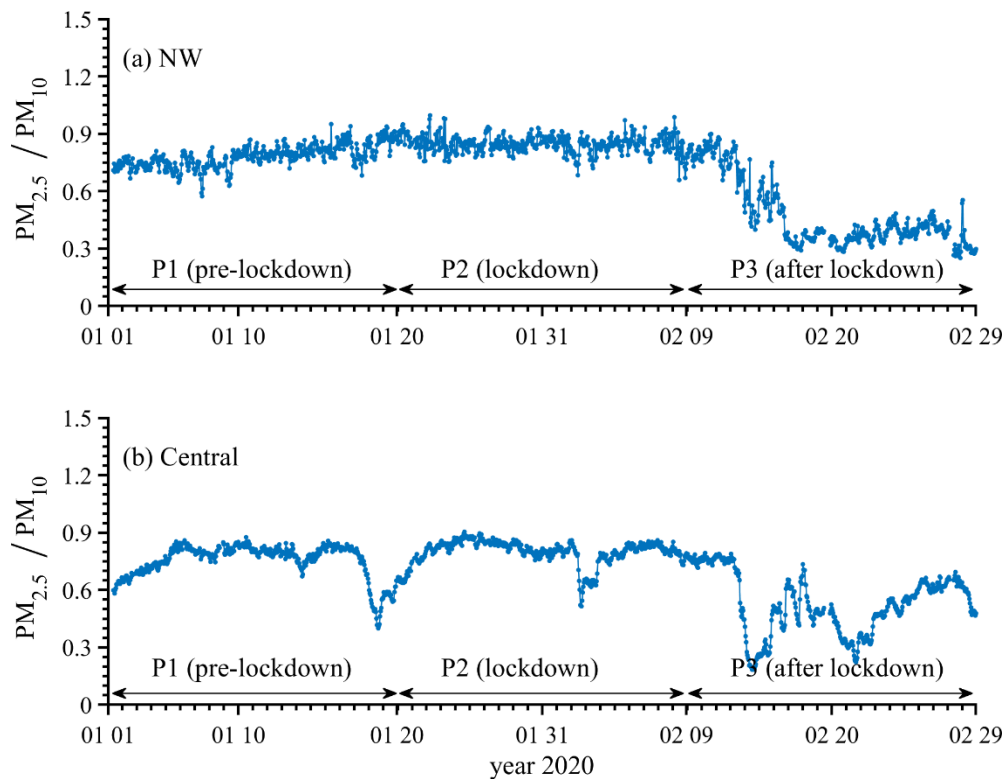

64  
65  
66  
67  
Figure S9: Timeseries of  $PM_{2.5}/PM_{10}$  ratio during COVID-19 pandemic over (a) NW and (b) Central region.

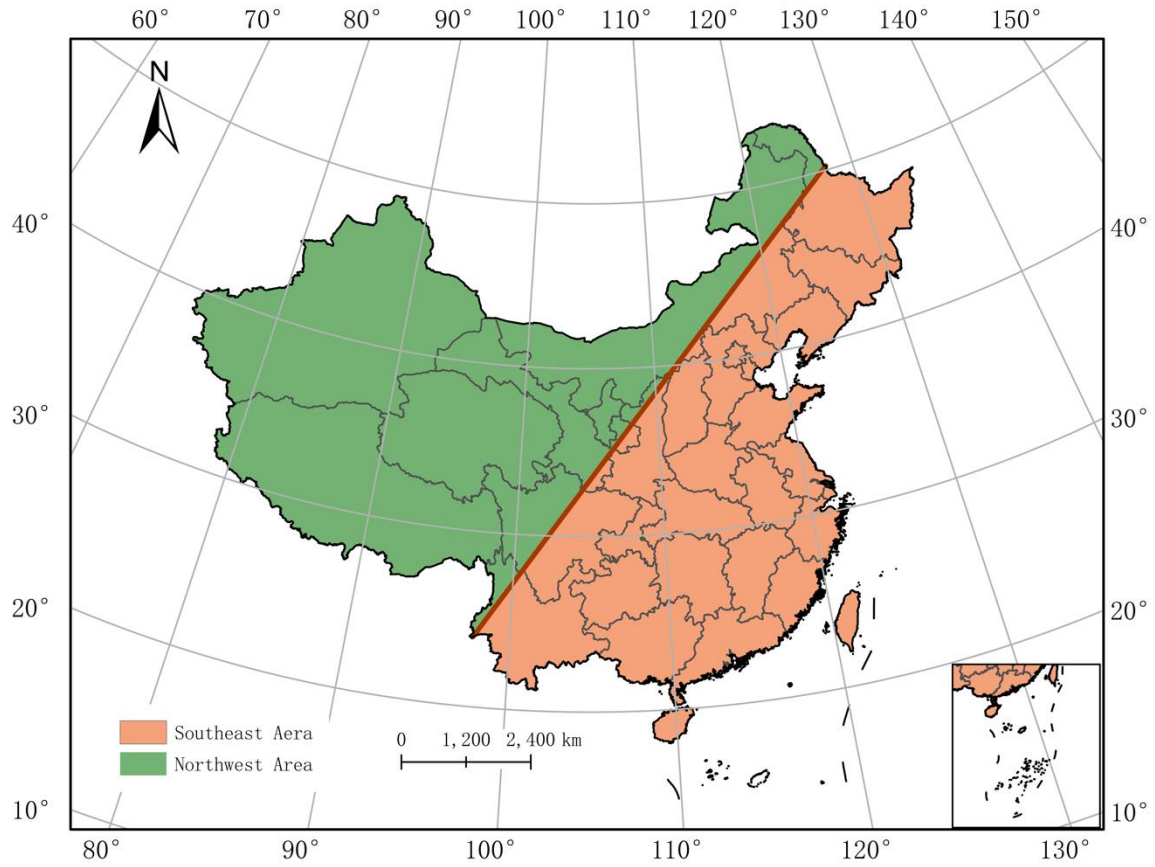

68

69

70

71

72

**Figure S10: Geographical definition of southeast China (orange part) and northwest (green part) based on the Hu Huanyong Line. This line divides the China based on the population with population in east of this line (southeast China) accounts for 86.72% of the total population in China.**



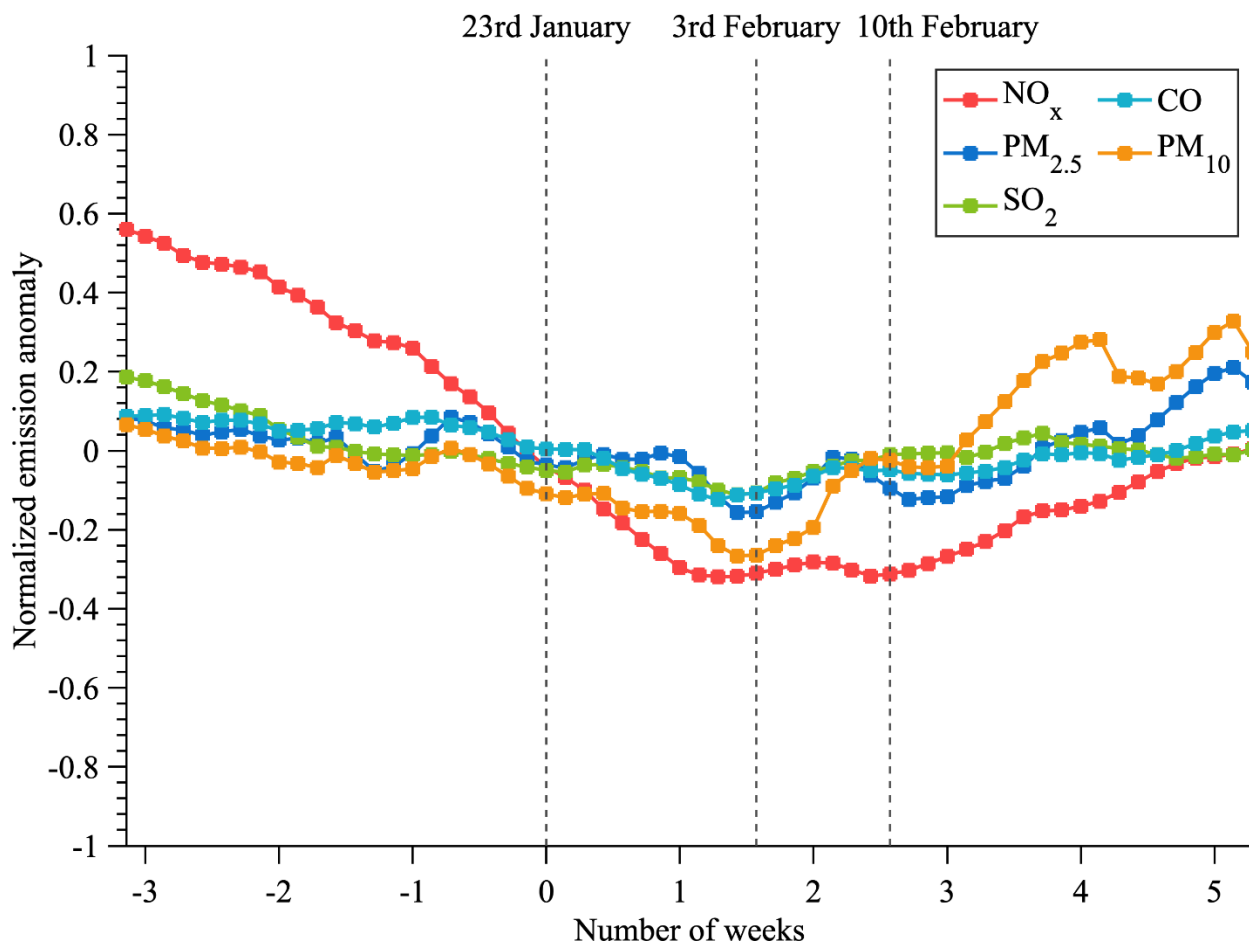

73

74  
75  
76

Figure S11: Time series of normalized emission anomaly estimated by inversion results for different species in southeast China (defined in Figure S10) from 1st January to 29th February 2020. The normalized emission anomaly is calculated by the emission anomaly divided by the averaged emission during the whole period.

77

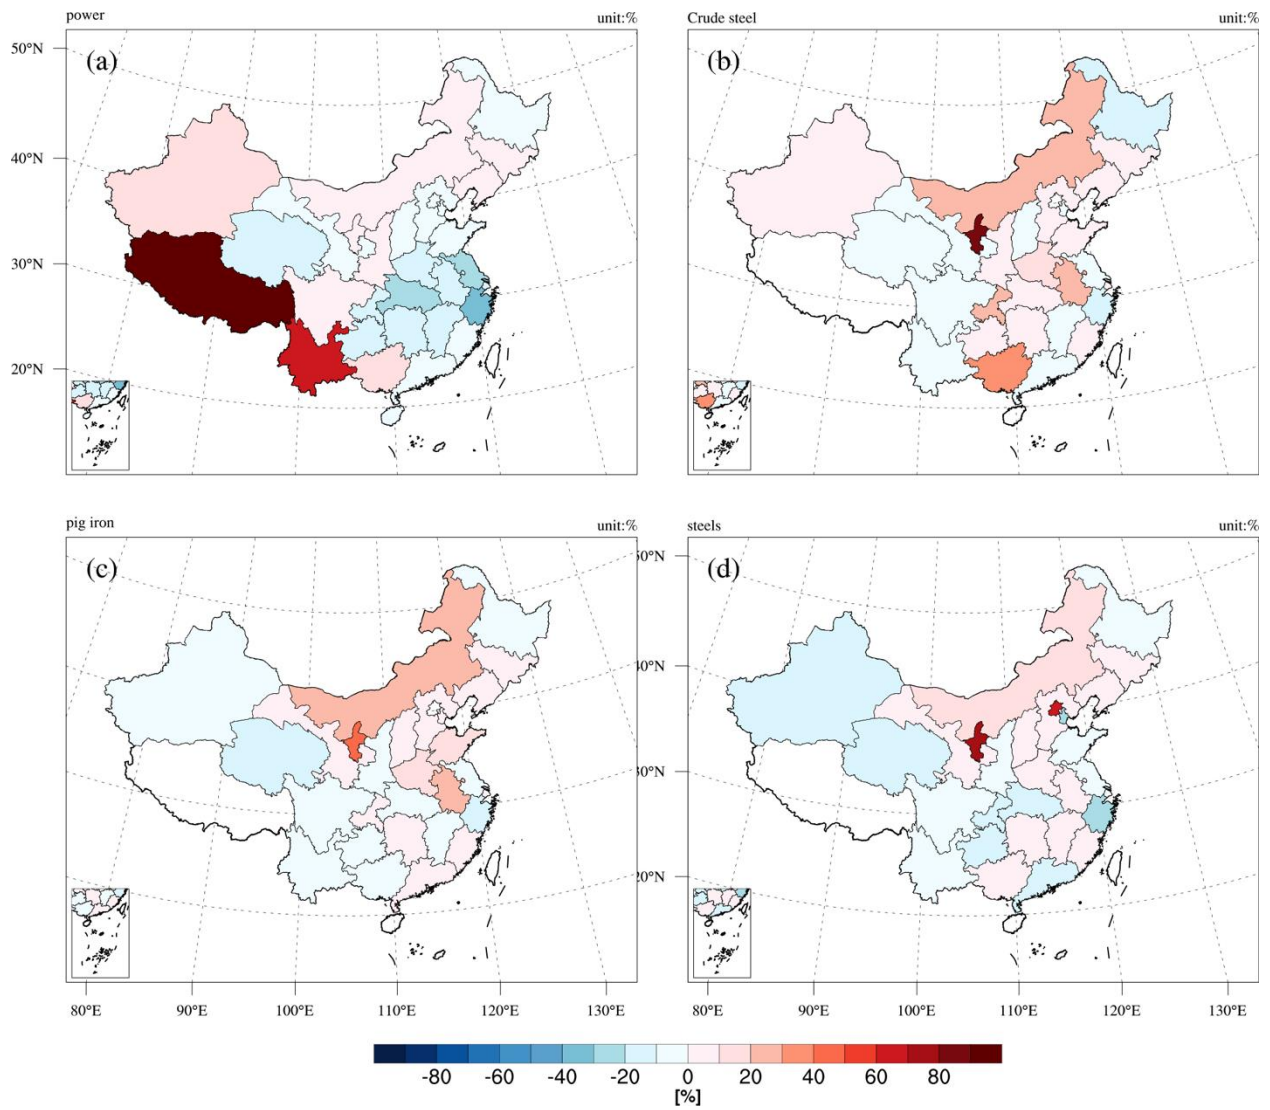

78

79  
80

Figure S12: Changes in (a) thermal power generation, productions of (b) crude steel, (c) pig iron, and (d) steels in China in the first two months of 2020 compared to those in 2019.

81

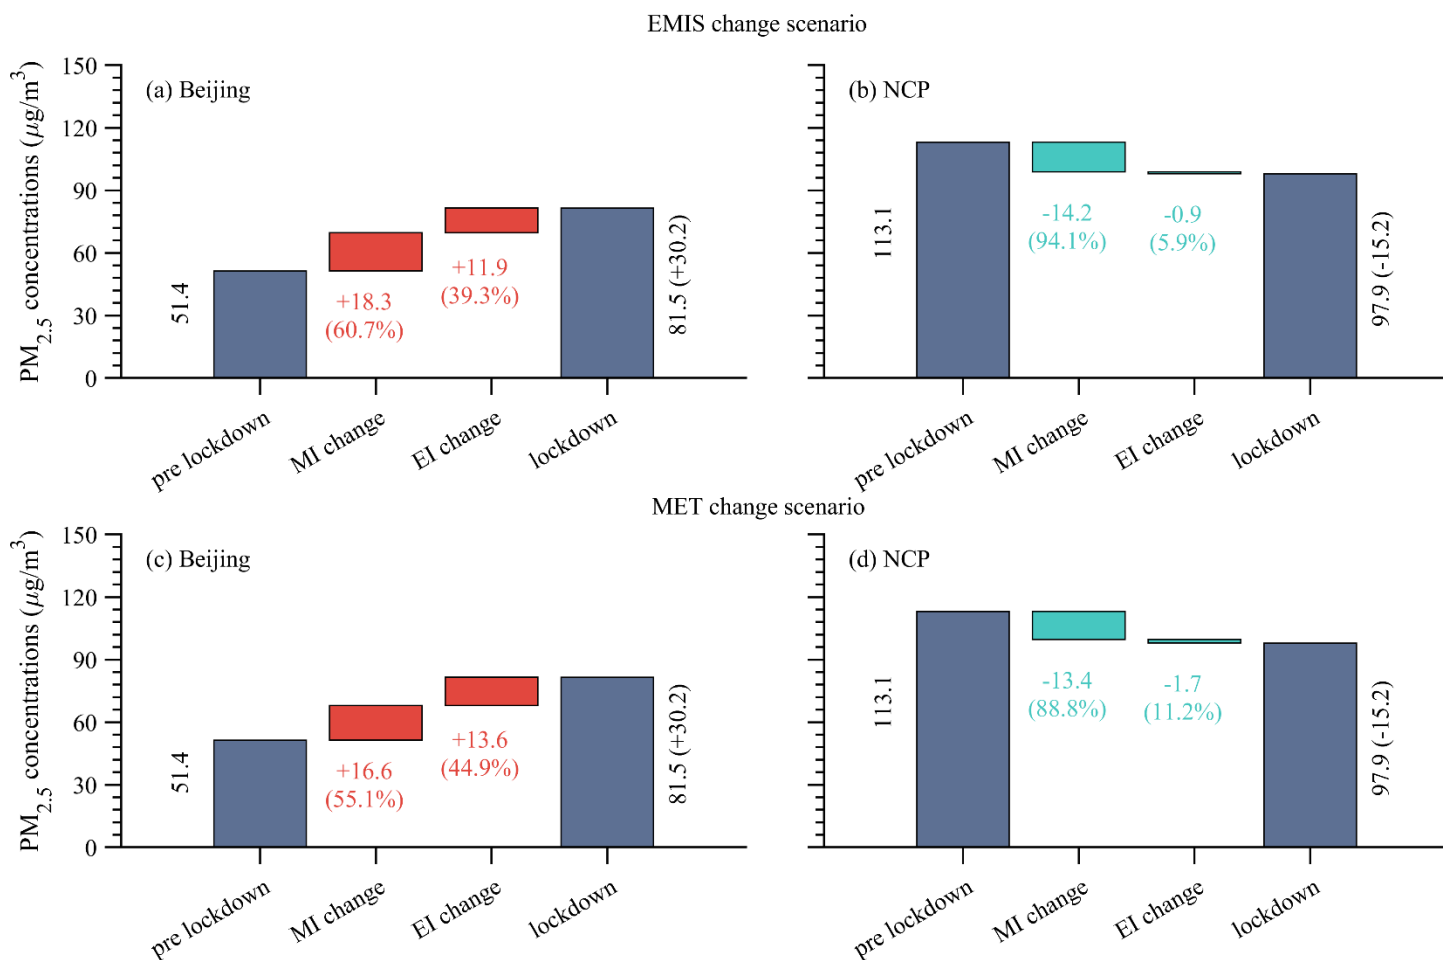

82  
83  
84 **Figure S13: The calculated MI and EI changes of PM<sub>2.5</sub> concentrations over the (a, c) Beijing and (b, d) the NCP region using the EMIS change scenario (upper panel) and MET change scenario (lower panel).**

EMIS change scenario

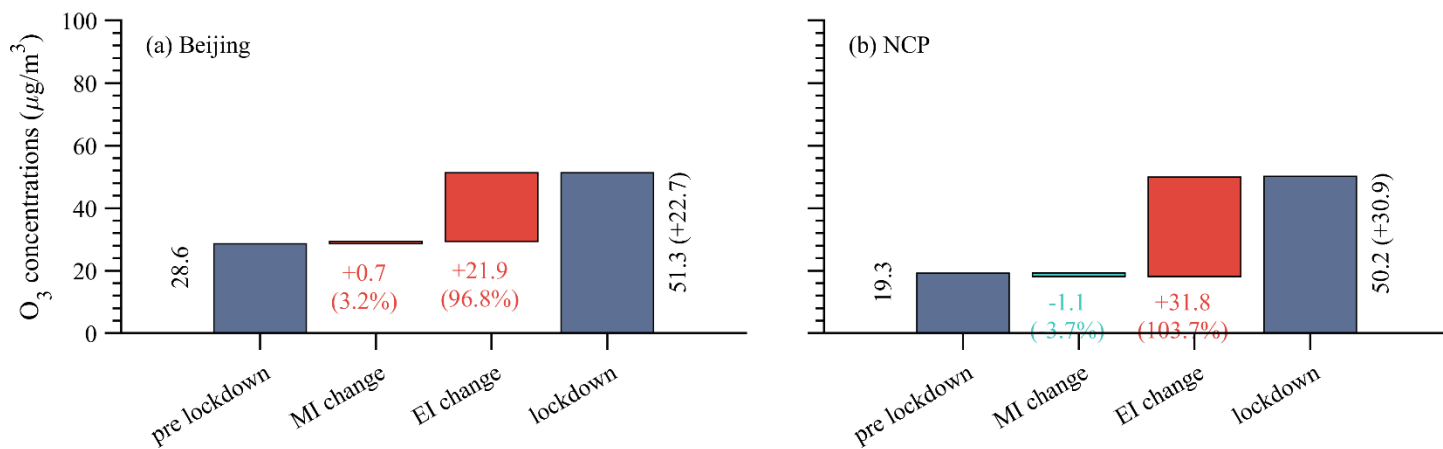

MET change scenario

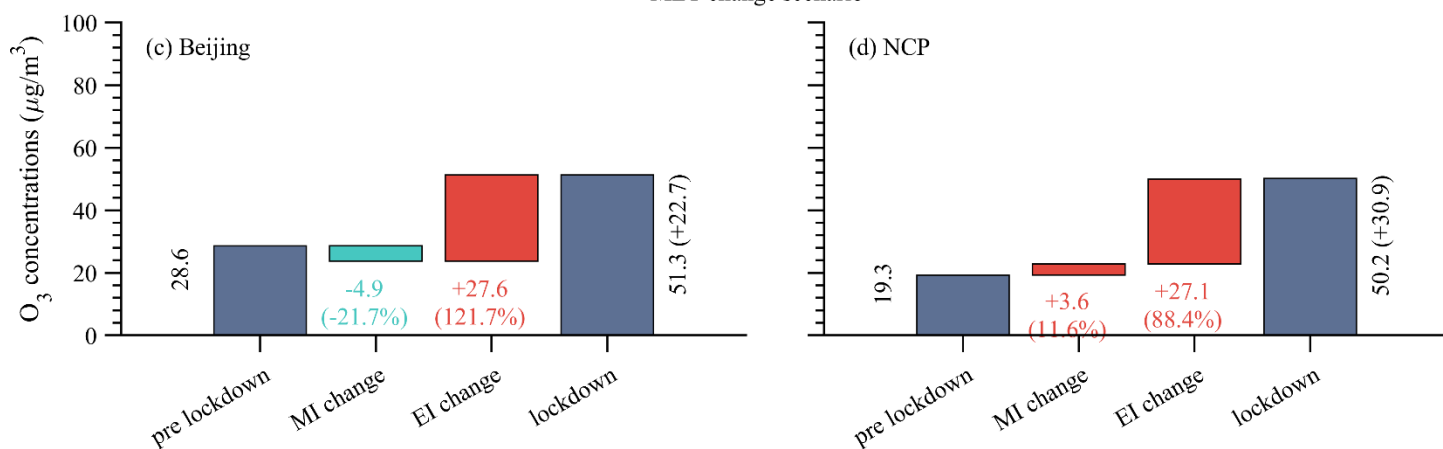

85  
86  
87 **Figure S14: The calculated MI and EI changes of O<sub>3</sub> concentrations over the (a, c) Beijing and (b, d) the NCP region using the EMIS change scenario (upper panel) and MET change scenario (lower panel).**

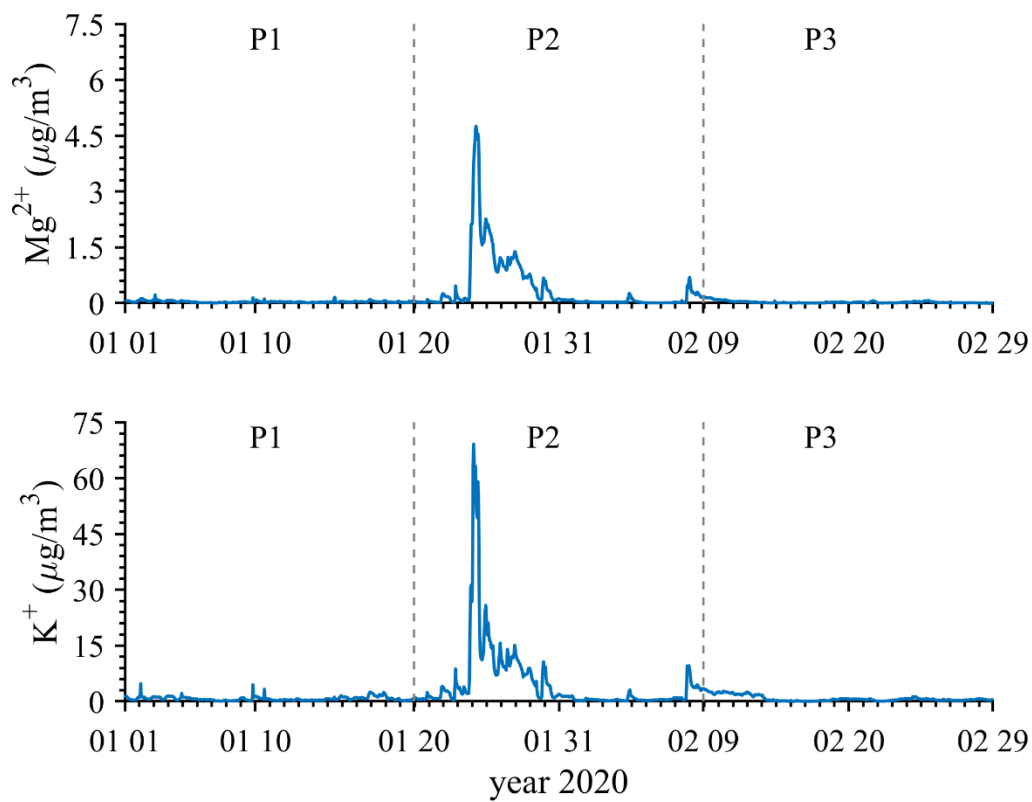

88  
 89 **Figure S15: Timeseries of averaged concentrations of potassium and magnesium ion during COVID-19 pandemic over the Beijing.**  
 90 **Measurements of potassium and magnesium ion were obtained from CNEMC.**  
 91

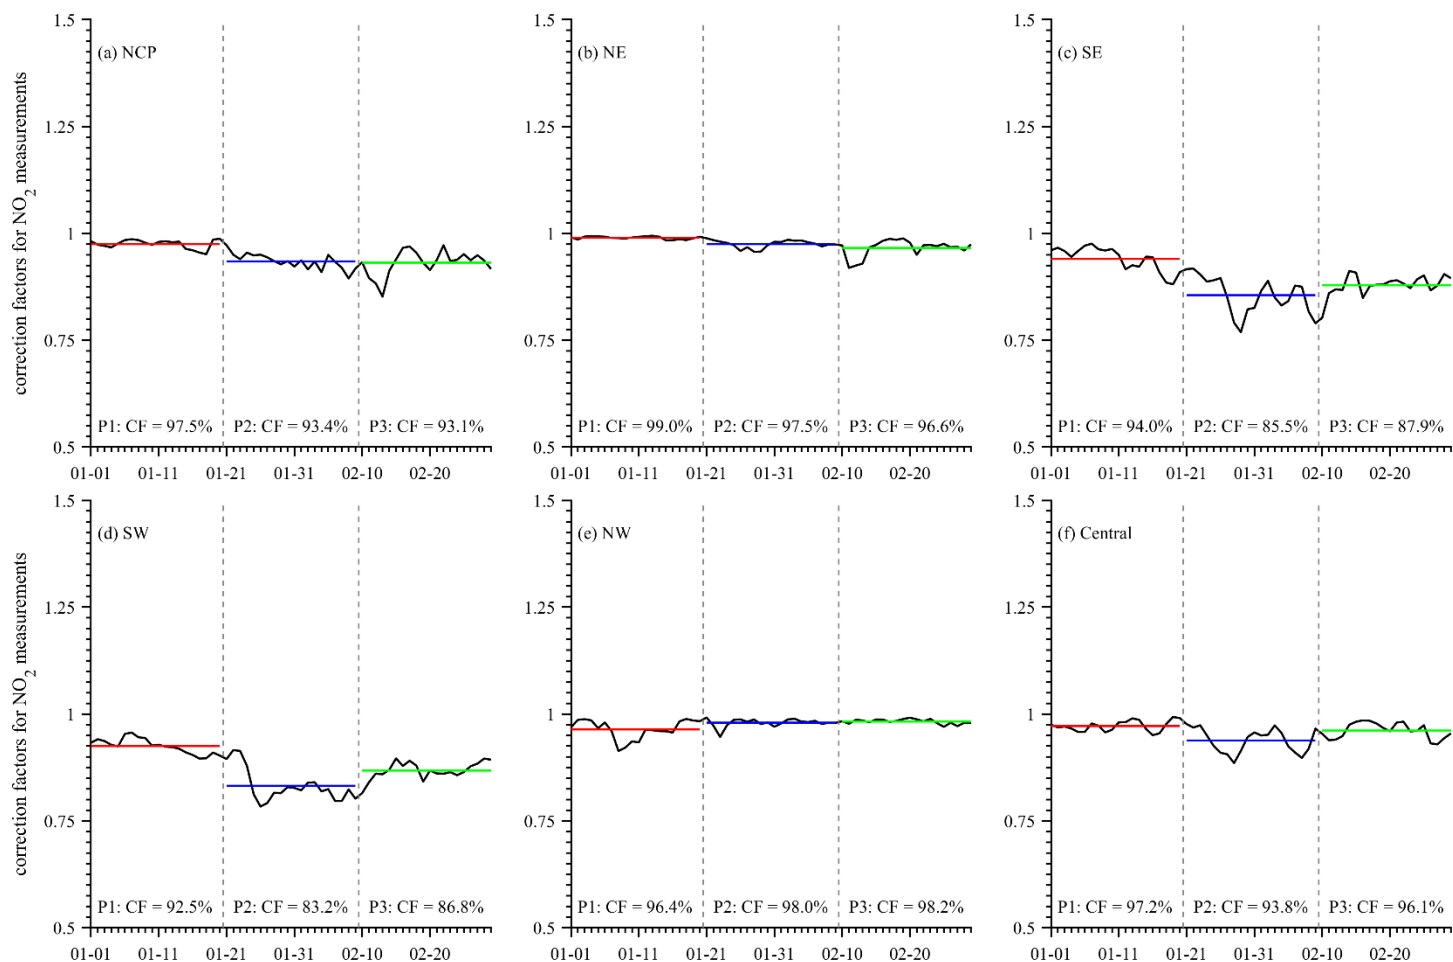

92  
93 **Figure S16: Time series of calculated CFs for NO<sub>2</sub> measurements over (a) NCP, (b) NE, (c) SE, (d) SW, (e) NW and (f) Central region during**  
94 **COVID-19 pandemic. The averaged CF values during different stages of COVID-19 pandemic are also labelled.**

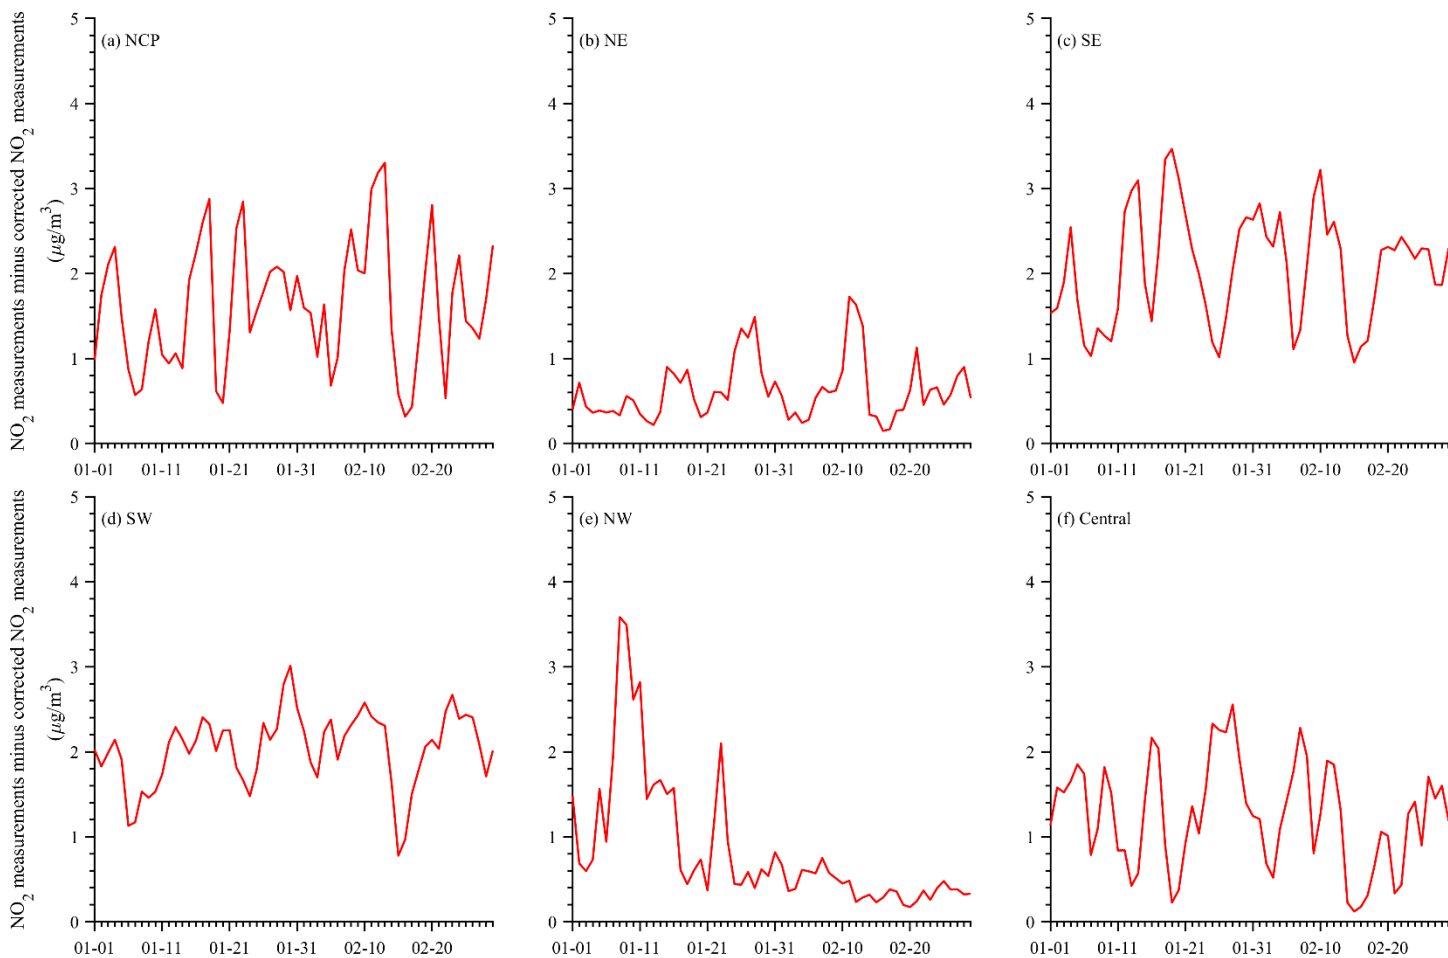

96  
97  
98

**Figure S17: the difference of NO<sub>2</sub> measurement before and after the corrections of chemiluminescence monitor interference over (a) NCP, (b) NE, (c) SE, (d) SW, (e) NW and (f) Central during the COVID-19 period.**

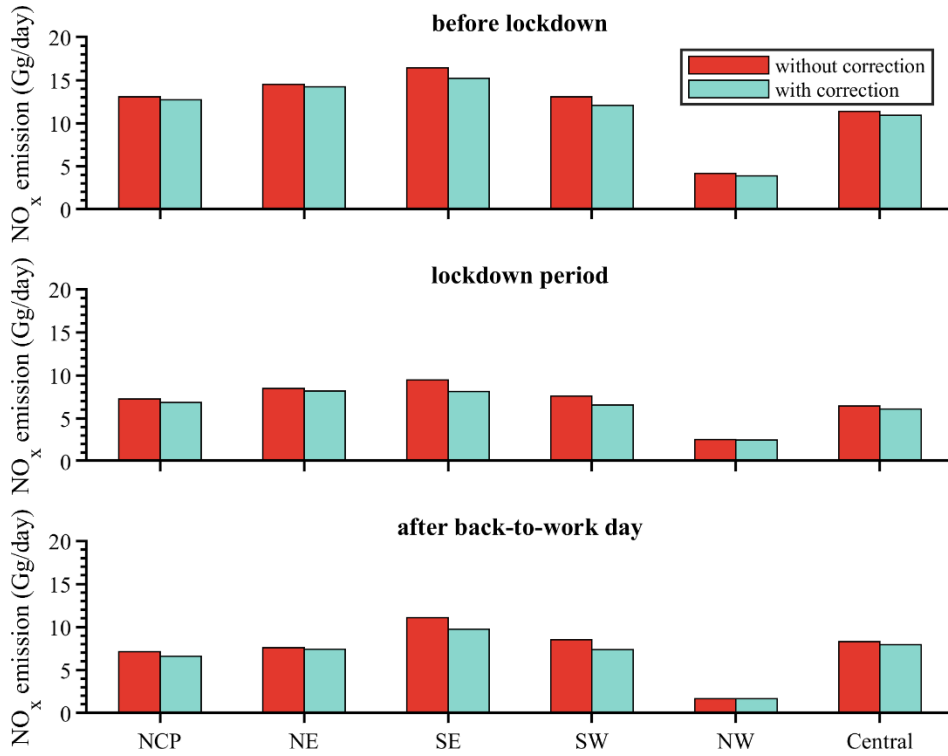

99  
100  
101  
Figure S18: Comparisons of inversed NO<sub>x</sub> emissions with (blue) and without (red) correction of NO<sub>2</sub> measurement over different regions of China during different period of COVID-19 pandemic.

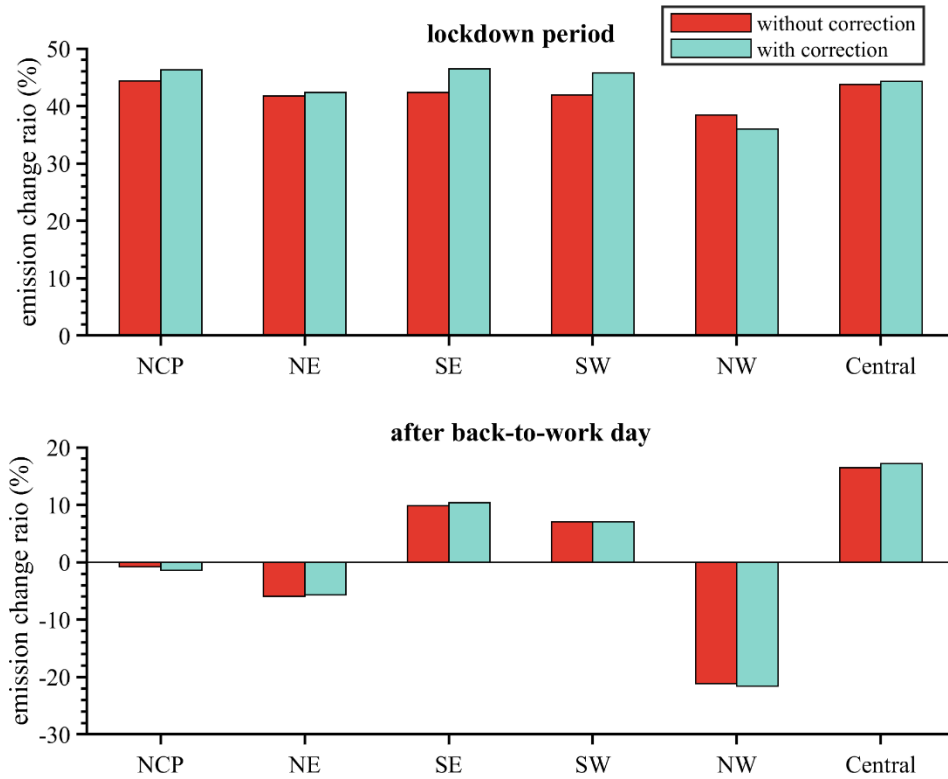

102  
103  
104  
Figure S19: Comparisons of the calculated emission change of NO<sub>x</sub> emissions based on the inversion results with (blue) and without (red) correction of NO<sub>2</sub> measurement over different regions of China.



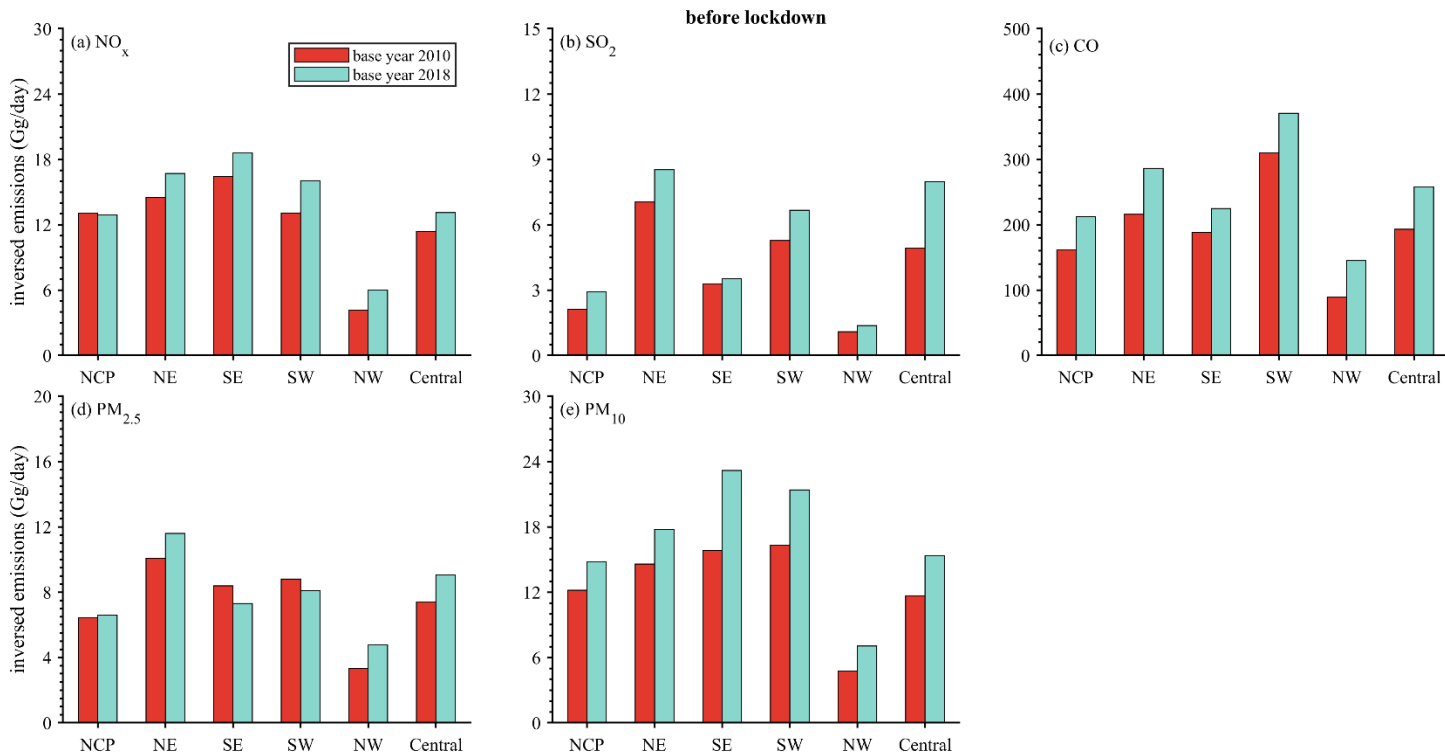

Figure S20: Comparisons of the inversion estimated total emissions of (a) NO<sub>x</sub>, (b) SO<sub>2</sub>, (c) CO, (d) PM<sub>2.5</sub> and (e) PM<sub>10</sub> before lockdown based on the a priori emissions for 2010 (red) with those based on the a priori emissions for 2018 (blue).

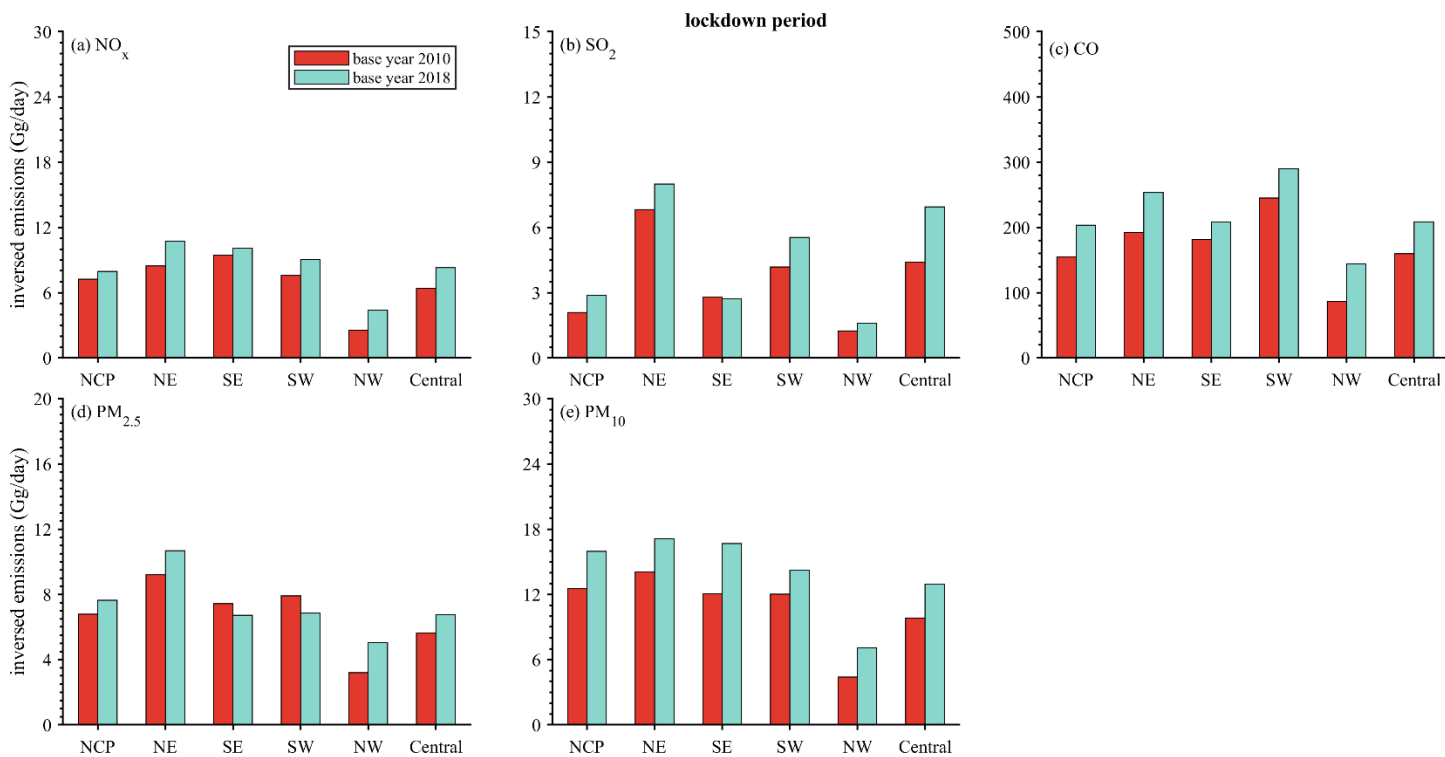

Figure S21: Same as Fig.S18 but for the lockdown period.

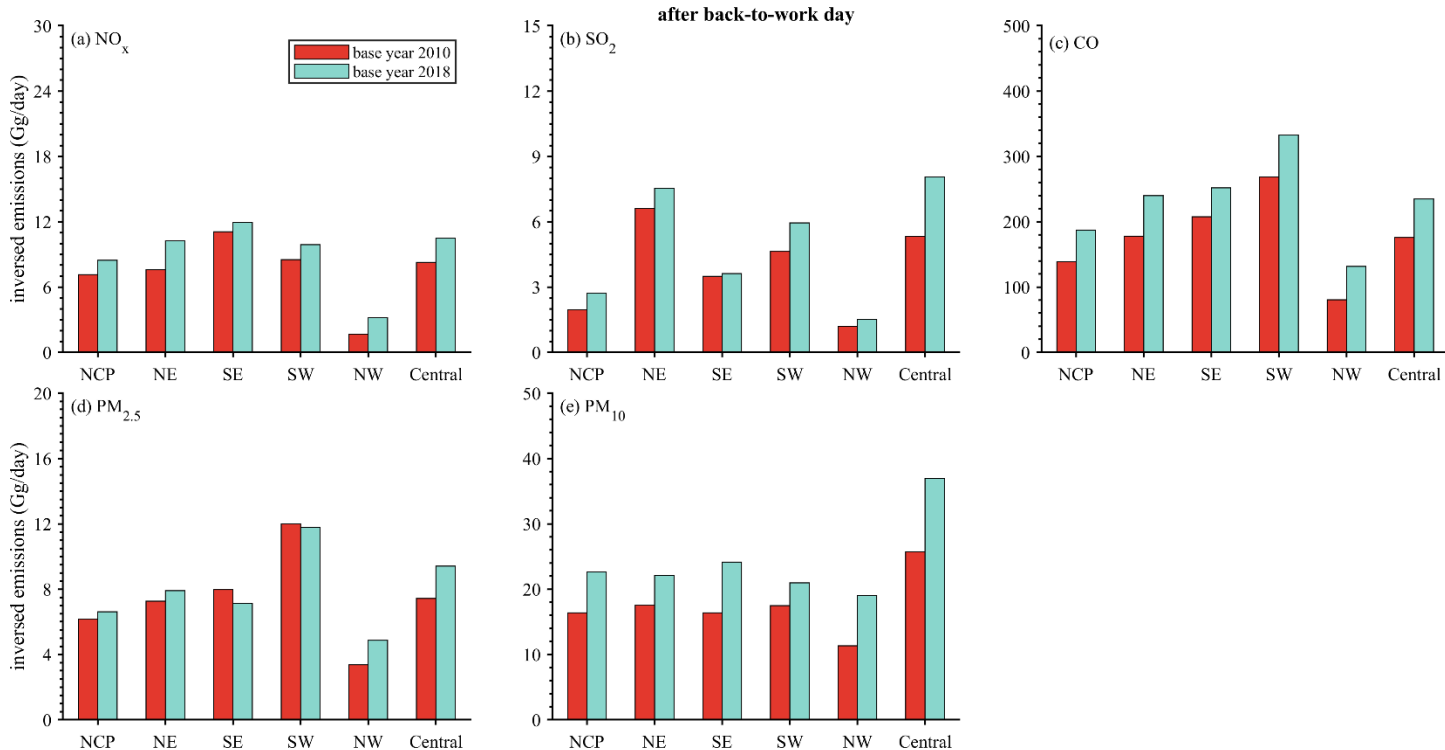

Figure S22: Same as Fig.S18 but for after back-to-work day.

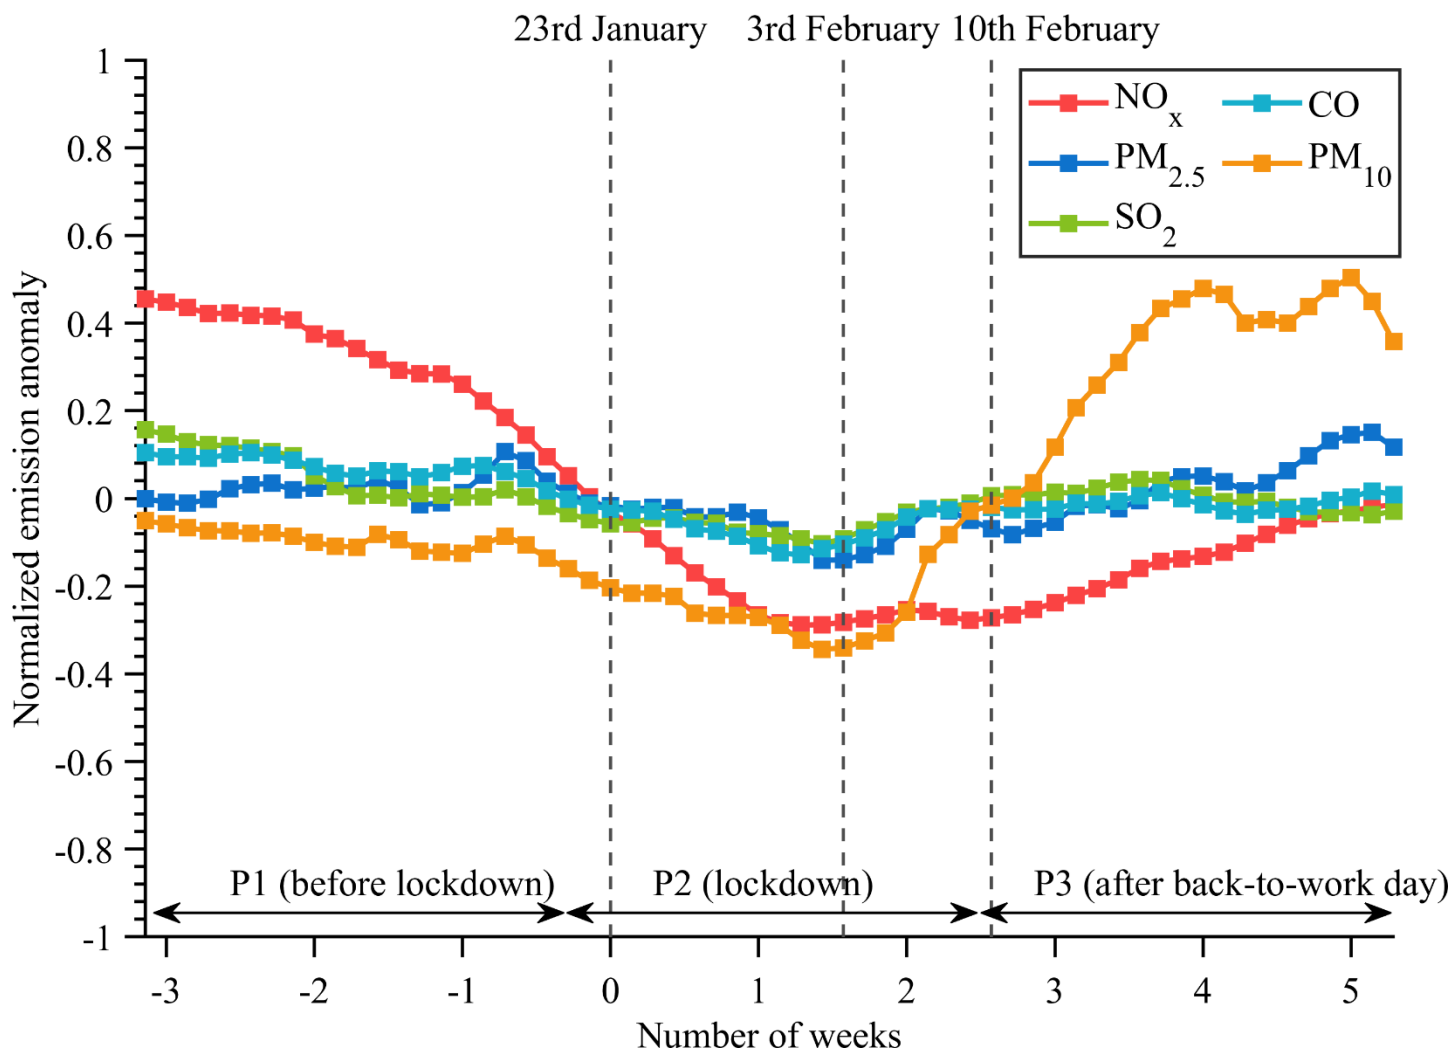

117  
118  
119

Figure S23: Time series of normalized emission anomalies estimated by inversion results for different species in China from 1st January to 29th February 2020 using the a priori emissions for 2018.

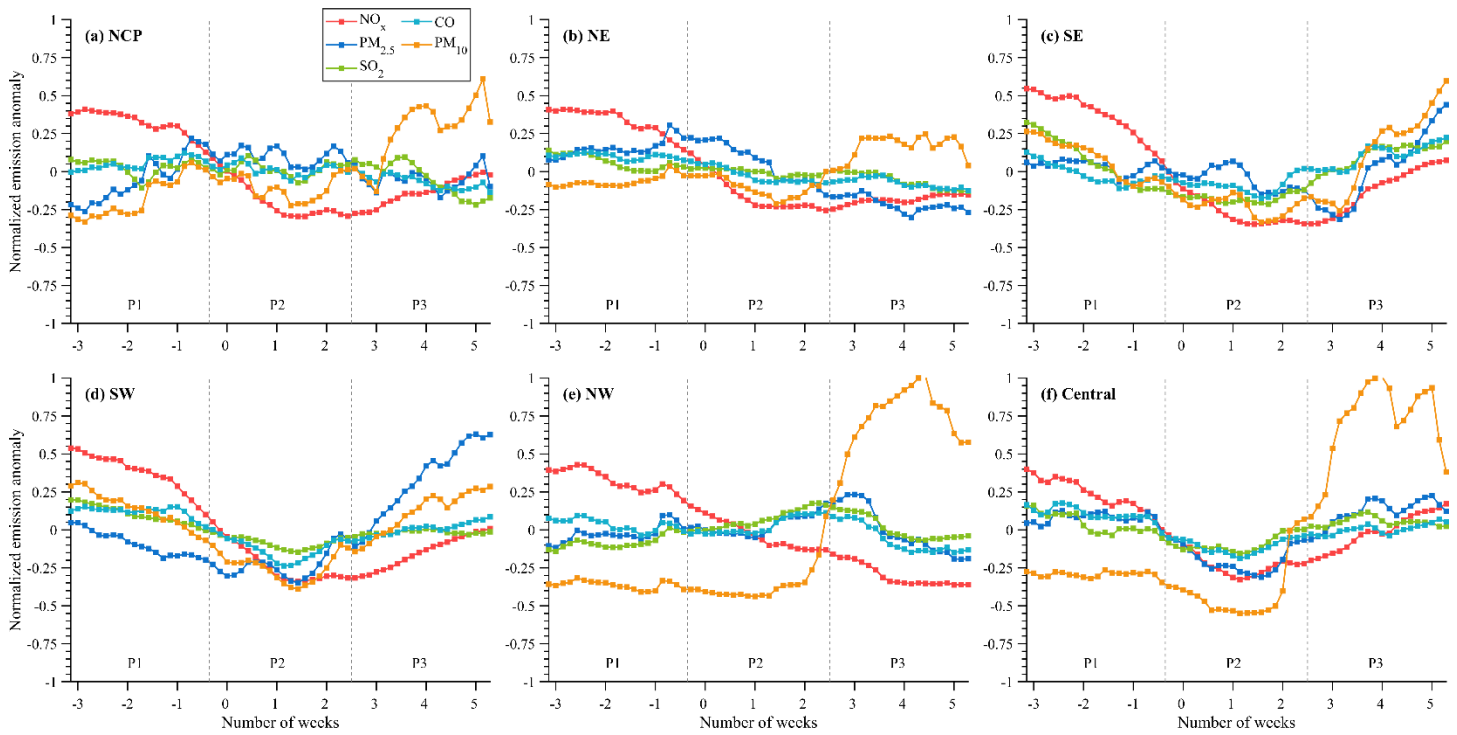

120  
 121 **Figure S24: Time series of normalized emission anomalies estimated by inversion results for different species over (a) NCP region, (b) NE**  
 122 **region, (c) SE region, (d) SW region, (e) NW region and (f) Central region from 1st January to 29th February 2020 using the a priori**  
 123 **emissions for 2018.**

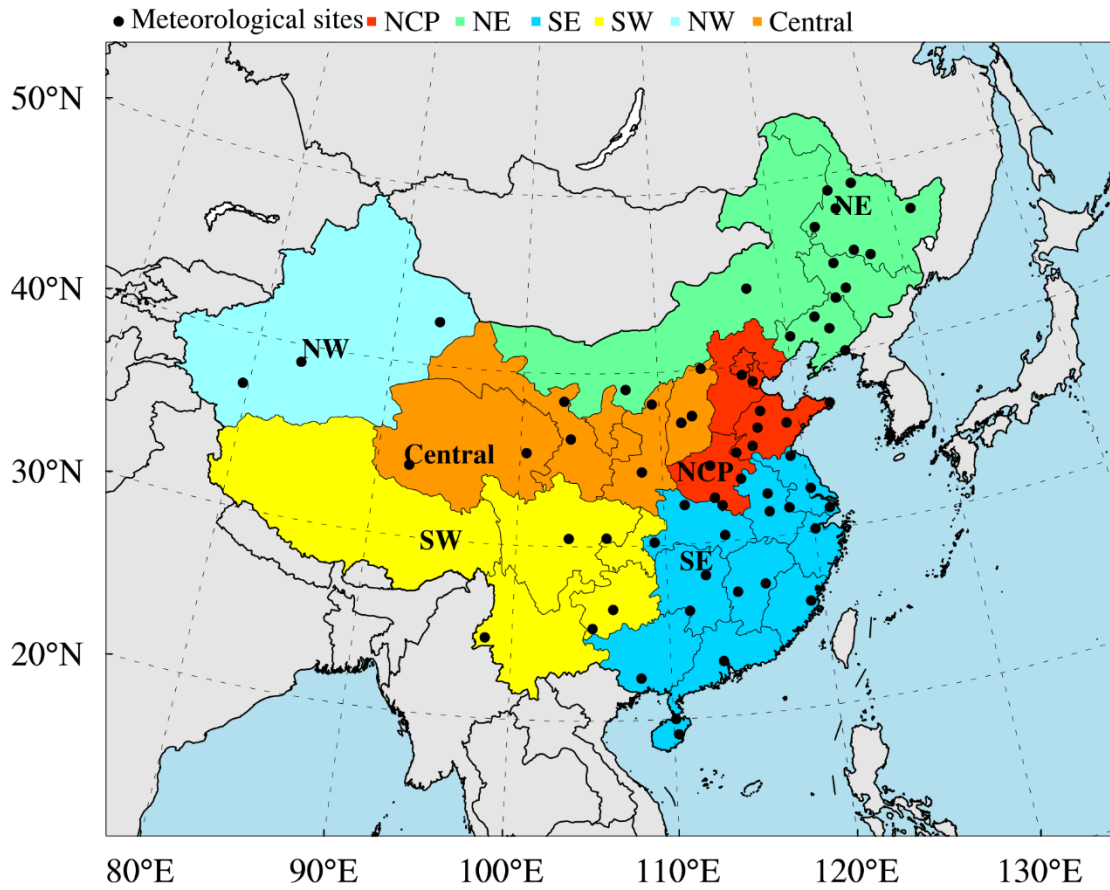

126

127

128

Figure S25: Spatial distribution of meteorological observation sites used in the evaluation of meteorology simulations over different regions of mainland China.

129

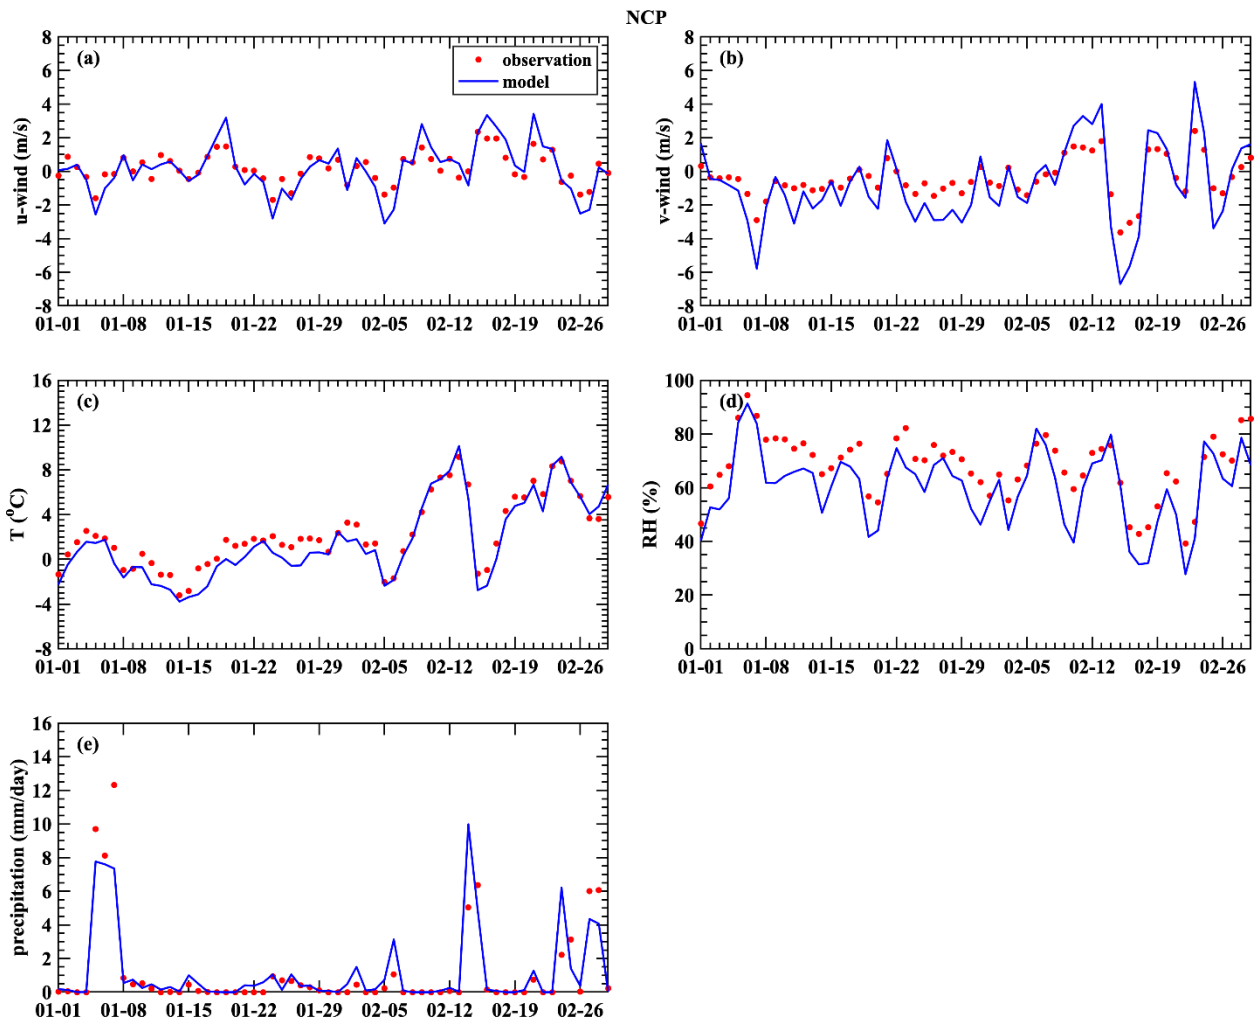

Figure S26: Timeseries of observed (red dots) and simulated (blue line) values of (a) u-wind, (b) v-wind, (c) temperature, (d) relative humidity and (e) precipitation over NCP region from 1st Jan 2020 to 29th Feb 2020.

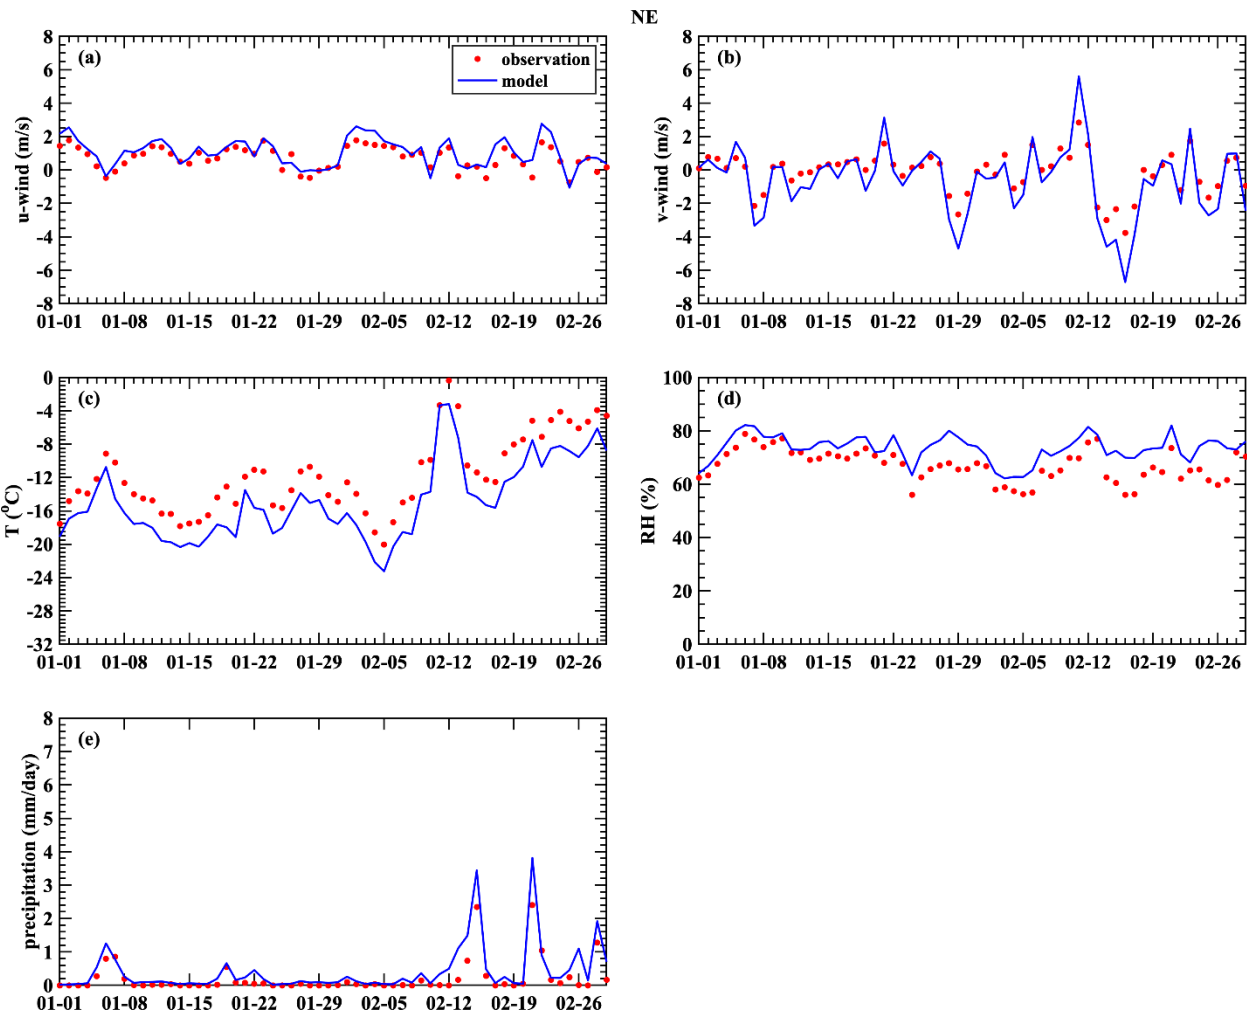

133

134

Figure S27: Same as in Figure S20 but over the NE region.

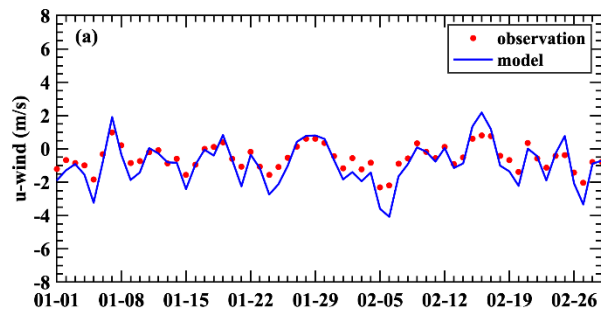

SE

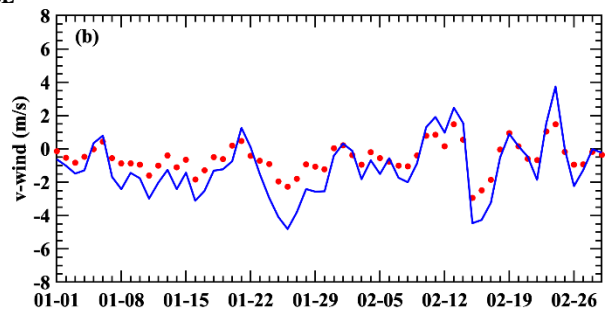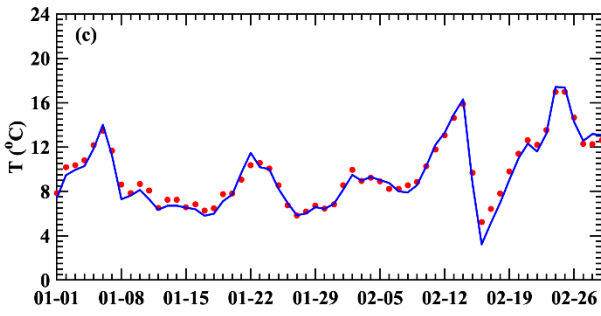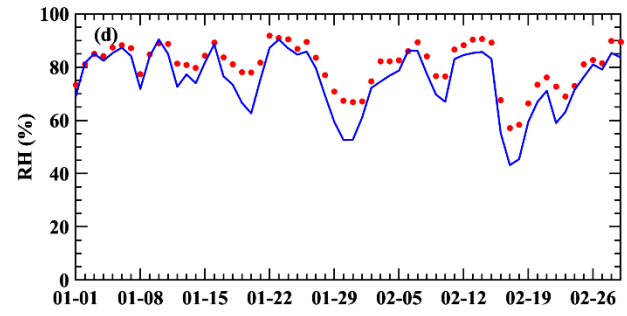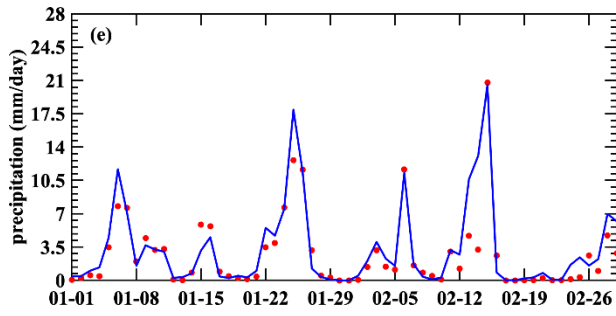

135

136

Figure S28: Same as in Figure S20 but over the SE region.



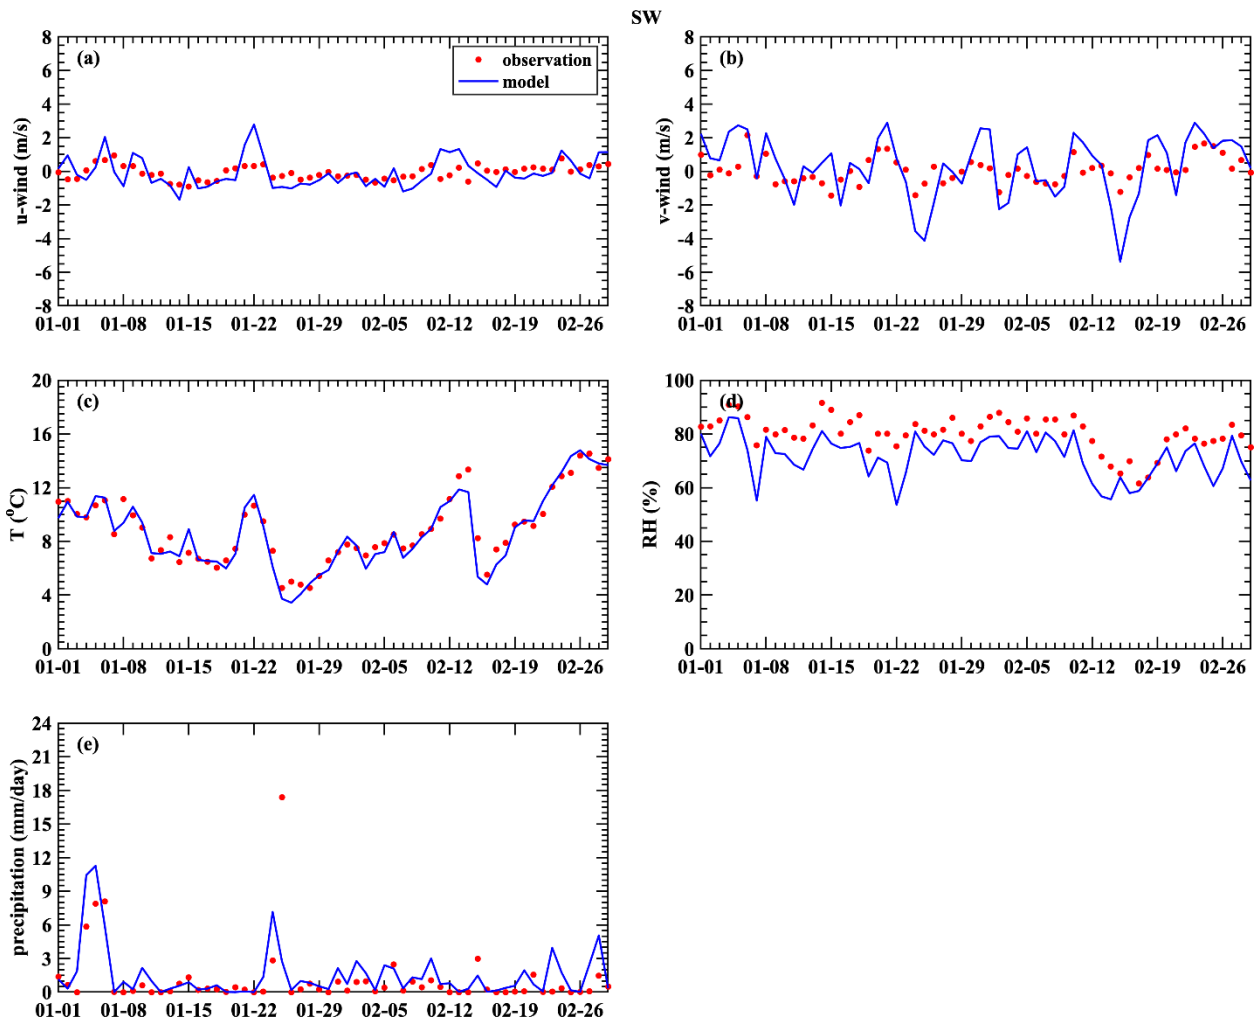

137

138

Figure S29: Same as in Figure S20 but over the SW region.

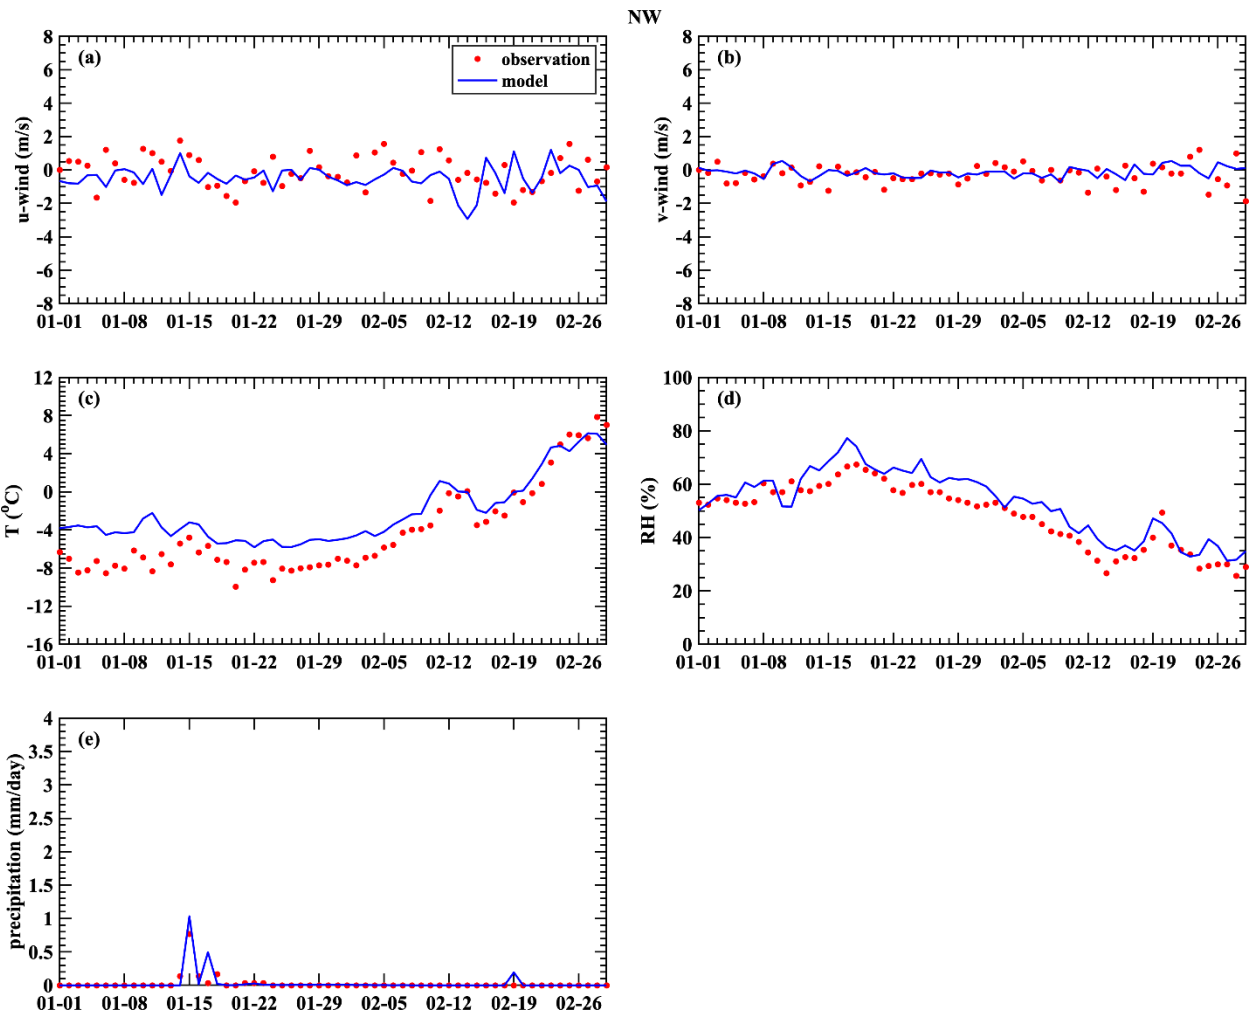

139

140

Figure S30: Same as in Figure S20 but over the NW region.

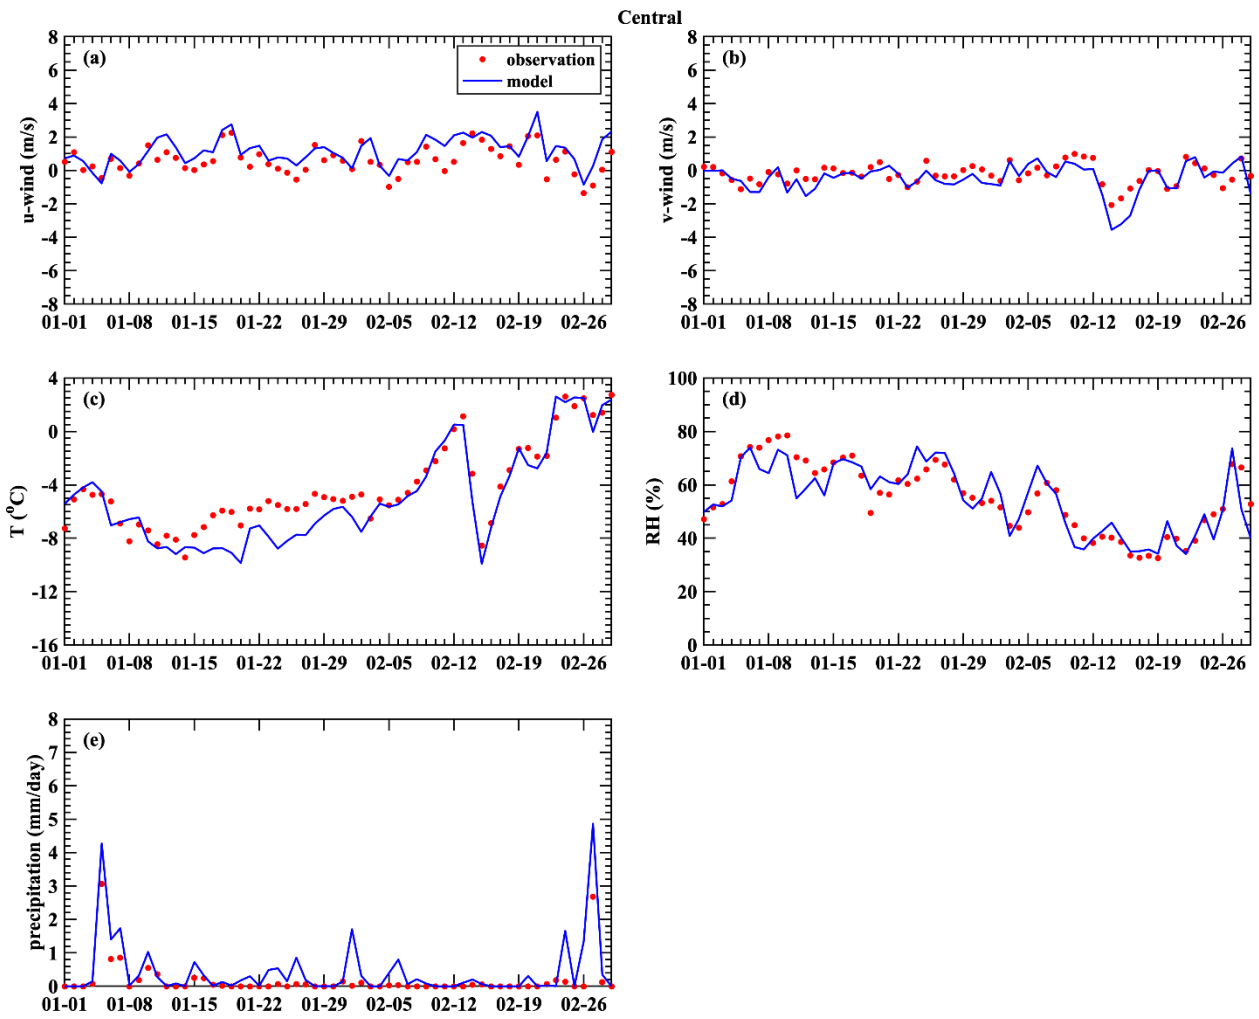

Figure S31: Same as in Figure S20 but over the Central region.

141

142

143

144

145

146

147

148

149

150

151

152

153

155 **Table S1: Evaluation statistics of cross-validation run (outside of bracket) and a priori simulation (inside bracket)**

|         | PM <sub>2.5</sub> (µg/m <sup>3</sup> ) |               |               |             | PM <sub>10</sub> (µg/m <sup>3</sup> ) |               |               |             |
|---------|----------------------------------------|---------------|---------------|-------------|---------------------------------------|---------------|---------------|-------------|
|         | R                                      | MBE           | NMB(%)        | RMSE        | R                                     | MBE           | NMB (%)       | RMSE        |
| NCP     | 0.94 (0.81)                            | 5.3 (66.5)    | 7.1 (90.0)    | 14.4 (77.4) | 0.92 (0.77)                           | 2.6 (65.1)    | 2.6 (66.6)    | 19.2 (79.8) |
| NE      | 0.91 (0.74)                            | 4.1 (1.2)     | 7.1 (2.0)     | 13.2 (19.5) | 0.87 (0.72)                           | 4.3 (-6.9)    | 5.7 (-9.0)    | 17.8 (23.0) |
| SE      | 0.89 (0.64)                            | 6.0 (68.5)    | 15.7 (179.0)  | 12.2 (73.8) | 0.86 (0.54)                           | 5.7 (74.6)    | 11.6 (153.6)  | 14.2 (81.6) |
| SW      | 0.75 (0.05)                            | 1.2 (54.4)    | 3.1 (141.5)   | 9.1 (63.1)  | 0.70 (-0.08)                          | -1.6 (53.4)   | -3.1 (102.6)  | 12.6 (65.9) |
| NW      | 0.74 (0.32)                            | 4.9 (-62.3)   | 5.3 (-67.7)   | 32.2 (71.1) | 0.63 (0.32)                           | 3.9 (-84.3)   | 3.3 (-70.8)   | 42.4 (94.6) |
| Central | 0.90 (0.70)                            | -2.7 (12.6)   | -3.9 (18.3)   | 13.2 (27.9) | 0.83 (0.41)                           | -7.3 (-4.6)   | -7.5 (-4.7)   | 20.6 (39.2) |
|         | NO <sub>2</sub> (µg/m <sup>3</sup> )   |               |               |             | SO <sub>2</sub> (µg/m <sup>3</sup> )  |               |               |             |
|         | R                                      | MBE           | NMB(%)        | RMSE        | R                                     | MBE           | NMB (%)       | RMSE        |
| NCP     | 0.94 (0.62)                            | 1.7 (7.6)     | 5.3 (24.2)    | 5.9 (14.6)  | 0.79 (0.60)                           | 0.0 (57.1)    | 0.4 (455.4)   | 2.8 (63.3)  |
| NE      | 0.91 (0.55)                            | 1.4 (-0.2)    | 5.1 (-0.7)    | 5.7 (10.6)  | 0.71 (0.54)                           | 1.1 (32.8)    | 6.2 (187.8)   | 4.6 (36.1)  |
| SE      | 0.91 (0.49)                            | 0.6 (9.5)     | 2.7 (45.5)    | 5.1 (13.3)  | 0.61 (0.35)                           | -0.6 (42.5)   | -9.5 (680.1)  | 1.2 (44.7)  |
| SW      | 0.76 (0.23)                            | 0.0 (-2.0)    | 0.0 (-10.6)   | 6.1 (8.8)   | 0.51 (0.16)                           | -0.5 (42.4)   | -6.7 (565.8)  | 1.7 (45.5)  |
| NW      | 0.78 (0.27)                            | -4.9 (-22.3)  | -12.6 (-57.3) | 12.3 (28.3) | 0.23 (-0.02)                          | -1.2 (13.5)   | -8.2 (88.7)   | 5.6 (17.9)  |
| Central | 0.90 (0.57)                            | -2.0 (-6.1)   | -6.5 (-20.0)  | 6.5 (13.1)  | 0.73 (0.54)                           | -1.3 (53.0)   | -6.5 (270.9)  | 4.9 (58.6)  |
|         | CO (mg/m <sup>3</sup> )                |               |               |             | O <sub>3</sub> (µg/m <sup>3</sup> )   |               |               |             |
|         | R                                      | MBE           | NMB(%)        | RMSE        | R                                     | MBE           | NMB (%)       | RMSE        |
| NCP     | 0.92 (0.85)                            | -0.03 (0.08)  | -2.2 (7.5)    | 0.16 (0.23) | 0.78 (0.61)                           | -14.5 (-28.8) | -28.6 (-56.9) | 20.7 (33.1) |
| NE      | 0.92 (0.78)                            | 0.05 (-0.33)  | 5.4 (-34.5)   | 0.15 (0.43) | 0.64 (0.58)                           | -17.7 (-25.3) | -32.7 (-46.7) | 22.7 (28.5) |
| SE      | 0.83 (0.74)                            | -0.05 (0.11)  | -6.0 (13.9)   | 0.10 (0.19) | 0.79 (0.74)                           | -7.2 (-18.2)  | -14.0 (-35.6) | 15.8 (22.3) |
| SW      | 0.63 (0.62)                            | -0.08 (-0.02) | -10.0 (-1.9)  | 0.17 (0.18) | 0.83 (0.82)                           | -5.7 (3.0)    | -11.8 (6.2)   | 11.7 (10.5) |
| NW      | 0.70 (0.08)                            | 0.11 (-1.13)  | 7.6 (-76.3)   | 0.46 (1.26) | 0.66 (0.38)                           | -18.9 (-4.7)  | -37.6 (-9.3)  | 25.4 (21.4) |
| Central | 0.91 (0.76)                            | -0.08 (-0.37) | -7.5 (-33.5)  | 0.18 (0.43) | 0.74 (0.70)                           | -17.9 (-14.8) | -35.3 (-29.3) | 23.7 (22.2) |

156

157

158

159

160

161

Table S2. The time of degrading responses level to COVID-19 virus in each province of mainland China.

| Province       | Region  | date                      | Measurement                                     |
|----------------|---------|---------------------------|-------------------------------------------------|
| Beijing        | NCP     | 30 <sup>th</sup> Apr 2020 | Degrade first level of response to second level |
| Tianjin        | NCP     | 30 <sup>th</sup> Apr 2020 | Degrade first level of response to second level |
| Hebei          | NCP     | 30 <sup>th</sup> Apr 2020 | Degrade first level of response to second level |
| Henan          | NCP     | 19 <sup>th</sup> Mar 2020 | Degrade first level of response to second level |
| Shandong       | NCP     | 7 <sup>th</sup> Mar 2020  | Degrade first level of response to second level |
| Inner Mongolia | NE      | 25 <sup>th</sup> Feb 2020 | Degrade first level of response to third level  |
| Jilin          | NE      | 26 <sup>th</sup> Feb 2020 | Degrade first level of response to second level |
| Liaoning       | NE      | 4 <sup>th</sup> Mar 2020  | Degrade first level of response to second level |
| Shanghai       | SE      | 24 <sup>th</sup> Mar 2020 | Degrade first level of response to second level |
| Anhui          | SE      | 25 <sup>th</sup> Feb 2020 | Degrade first level of response to second level |
| Guangdong      | SE      | 24 <sup>th</sup> Feb 2020 | Degrade first level of response to second level |
| Guangxi        | SE      | 24 <sup>th</sup> Feb 2020 | Degrade first level of response to third level  |
| Jiangsu        | SE      | 25 <sup>th</sup> Feb 2020 | Degrade first level of response to second level |
| Jiangxi        | SE      | 12 <sup>th</sup> Mar 2020 | Degrade first level of response to second level |
| Zhejiang       | SE      | 2 <sup>nd</sup> Mar 2020  | Degrade first level of response to second level |
| Hainan         | SE      | 26 <sup>th</sup> Feb 2020 | Degrade first level of response to third level  |
| Hubei          | SE      | 2 <sup>nd</sup> May 2020  | Degrade first level of response to second level |
| Hunan          | SE      | 10 <sup>th</sup> Mar 2020 | Degrade first level of response to second level |
| Fujian         | SE      | 27 <sup>th</sup> Feb 2020 | Degrade first level of response to second level |
| Yunnan         | SW      | 24 <sup>th</sup> Feb 2020 | Degrade first level of response to third level  |
| Sichuan        | SW      | 26 <sup>th</sup> Feb 2020 | Degrade first level of response to second level |
| Guizhou        | SW      | 24 <sup>th</sup> Feb 2020 | Degrade first level of response to third level  |
| Chongqing      | SW      | 10 <sup>th</sup> Mar 2020 | Degrade first level of response to second level |
| Xizang         | SW      | 7 <sup>th</sup> Mar 2020  | Degrade first level of response to third level  |
| Ningxia        | Central | 28 <sup>th</sup> Feb 2020 | Degrade first level of response to second level |
| Shanxi         | Central | 24 <sup>th</sup> Feb 2020 | Degrade first level of response to second level |
| Gansu          | Central | 21 <sup>st</sup> Feb 2020 | Degrade first level of response to third level  |
| Shanxi         | Central | 28 <sup>th</sup> Feb 2020 | Degrade first level of response to third level  |
| Qinghai        | Central | 26 <sup>th</sup> Feb 2020 | Degrade first level of response to third level  |
| Xinjiang       | NW      | 26 <sup>th</sup> Feb 2020 | Degrade first level of response to second level |

168  
169**Table S3. Inversion estimated emissions of different air pollutants in southeast China as well as their changes between different periods in COVID-19 time**

|             | NO <sub>x</sub> | PM <sub>2.5</sub> | PM <sub>10</sub> | SO <sub>2</sub> | CO     |
|-------------|-----------------|-------------------|------------------|-----------------|--------|
| P1 (Gg/day) | 57.1            | 34.8              | 60.9             | 17.9            | 876.3  |
| P2 (Gg/day) | 32.9            | 31.8              | 52.1             | 16.0            | 774.7  |
| P3 (Gg/day) | 35.9            | 34.3              | 71.0             | 17.0            | 805.2  |
| (P2-P1)/P1  | -42.4%          | -8.6%             | -14.3%           | -10.9%          | -11.6% |
| (P3-P2)/P1  | 5.2%            | 7.2%              | 31.0%            | 5.7%            | 3.5%   |
| (P3-P1)/P1  | -37.2%          | -1.4%             | 16.6%            | -5.2%           | -8.1%  |

170

171

**Table S4: Evaluation statistics for the meteorology simulation**

| Region  | U (m/s) |       |      | V (m/s) |       |      | T (°C) |       |      | RH (%) |       |      | Precipitation (mm/day) |      |      |
|---------|---------|-------|------|---------|-------|------|--------|-------|------|--------|-------|------|------------------------|------|------|
|         | R       | MBE   | RMSE | R       | MBE   | RMSE | R      | MBE   | RMSE | R      | MBE   | RMSE | R                      | MBE  | RMSE |
| NCP     | 0.92    | -0.04 | 0.72 | 0.96    | -0.38 | 1.31 | 0.98   | -0.71 | 1.07 | 0.91   | -7.95 | 9.76 | 0.88                   | 0.06 | 1.22 |
| NE      | 0.90    | 0.35  | 0.51 | 0.97    | -0.45 | 1.01 | 0.98   | -3.13 | 3.25 | 0.79   | 6.53  | 7.47 | 0.95                   | 0.20 | 0.36 |
| SE      | 0.95    | -0.32 | 0.69 | 0.96    | -0.55 | 1.07 | 0.99   | -0.21 | 0.58 | 0.96   | -5.44 | 6.80 | 0.91                   | 0.59 | 1.96 |
| SW      | 0.46    | 0.00  | 0.78 | 0.65    | 0.24  | 1.48 | 0.96   | -0.19 | 0.81 | 0.81   | -8.53 | 9.66 | 0.56                   | 0.42 | 2.38 |
| NW      | -0.01   | -0.39 | 1.27 | 0.16    | 0.16  | 0.64 | 0.96   | 2.07  | 2.60 | 0.94   | 4.71  | 6.23 | 0.86                   | 0.01 | 0.08 |
| CENTRAL | 0.92    | -0.04 | 0.72 | 0.78    | -0.26 | 0.60 | 0.94   | -0.73 | 1.42 | 0.88   | -0.40 | 6.14 | 0.91                   | 0.26 | 0.53 |

172

173

**References:**

174

Dunlea, E. J., Herndon, S. C., Nelson, D. D., Volkamer, R. M., San Martini, F., Sheehy, P. M., Zahniser, M. S.,

175

Shorter, J. H., Wormhoudt, J. C., Lamb, B. K., Allwine, E. J., Gaffney, J. S., Marley, N. A., Grutter, M., Marquez,

176

C., Blanco, S., Cardenas, B., Retama, A., Villegas, C. R. R., Kolb, C. E., Molina, L. T., and Molina, M. J.:

177

Evaluation of nitrogen dioxide chemiluminescence monitors in a polluted urban environment, *Atmos. Chem.*

178

*Phys.*, 7, 2691-2704, <https://doi.org/10.5194/acp-7-2691-2007>, 2007.

179

Lamsal, L. N., Martin, R. V., van Donkelaar, A., Steinbacher, M., Celarier, E. A., Bucsela, E., Dunlea, E. J., and

180

Pinto, J. P.: Ground-level nitrogen dioxide concentrations inferred from the satellite-borne Ozone Monitoring

181

Instrument, *J. Geophys. Res.-Atmos.*, 113, <https://doi.org/10.1029/2007JD009235>, 2008.

182
